# Supplementary material
Source: PubMed Central journal article supplement (PMC4864610)
Supplement: NIHMS783327-supplement-Fig_S1-S5__T1-T2.pdf [file NIHMS783327-supplement-Fig_S1-S5__T1-T2.pdf]

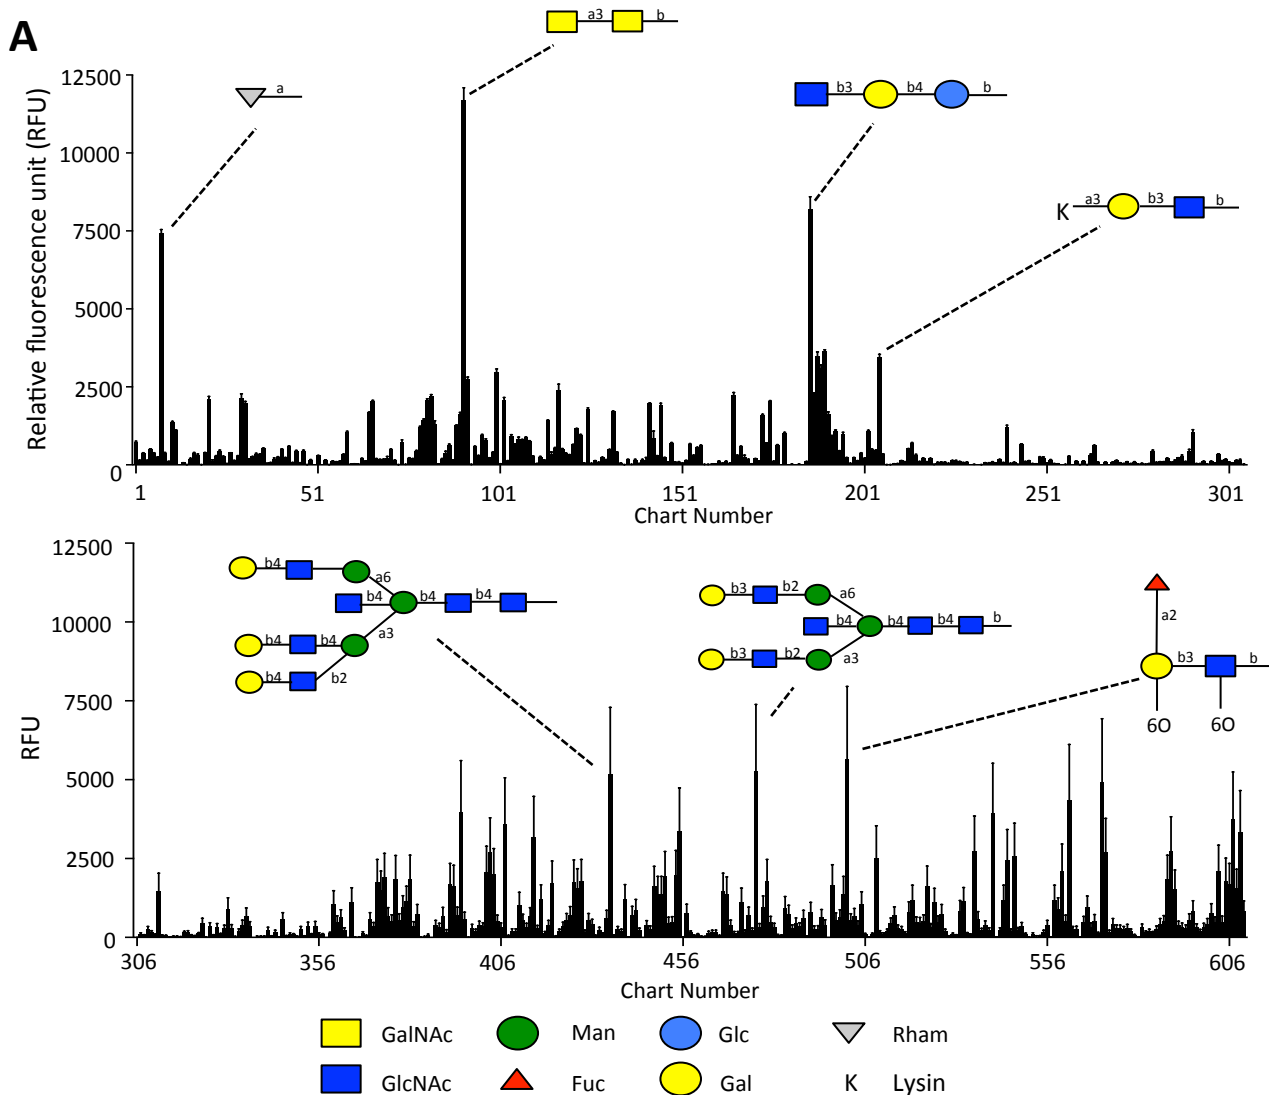

**B**

The top 20 glycans bound by Privigen.

| Chart # | Glycan Name                                                                                          | Antibody binding ratio (ABR) |
|---------|------------------------------------------------------------------------------------------------------|------------------------------|
| 562     | GalNAcb1-3GlcNAcb-Sp0                                                                                | 43449.31575                  |
| 30      | (3S)Galb1-3GlcNAcb-Sp0                                                                               | 21369.6875                   |
| 377     | Neu5Aca2-6Galb1-4GlcNAcb1-3GalNAc-Sp14                                                               | 18457.11625                  |
| 65      | Fuca1-2Galb1-3GlcNAcb1-3Galb1-4Glc-Sp8                                                               | 16635.94575                  |
| 90      | GalNAca1-3(Fuca1-2)Galb-Sp18                                                                         | 16223.9325                   |
| 114     | Gala1-3Galb1-3GlcNAcb-Sp0                                                                            | 14177.7985                   |
| 525     | Gala1-3(Fuca1-2)Galb1-3GlcNAcb1-6GalNAc-Sp14                                                         | 11079.85325                  |
| 123     | Gala1-4GlcNAcb-Sp8                                                                                   | 9381.1425                    |
| 331     | Neu5Aca2-3Galb1-3(Fuca1-4)GlcNAcb1-3Galb1-3(Fuca1-4)GlcNAcb-Sp0                                      | 8931.22675                   |
| 107     | Gala1-3(Fuca1-2)Galb-Sp8                                                                             | 8055.35775                   |
| 491     | Neu5Aca2-3Galb1-3GlcNAcb1-6GalNAca-Sp14                                                              | 7876.8205                    |
| 485     | Galb1-4GlcNAcb1-6(Galb1-4GlcNAcb1-2)Mana1-6(Galb1-4GlcNAcb1-2)Manb1-4GlcNAcb1-4(Fuca1-6)GlcNAcb-Sp24 | 7270.845                     |
| 514     | GalNAcb1-4(6S)GlcNAc-Sp8                                                                             | 6894.9575                    |
| 414     | GalNAca1-3(Fuca1-2)Galb1-4GlcNAcb1-3GalNAca-Sp14                                                     | 6734.65                      |
| 494     | Fuca1-2Galb1-4GlcNAcb1-6GalNAca-Sp14                                                                 | 6290.3545                    |
| 105     | Gala1-3(Fuca1-2)Galb1-4GlcNAc-Sp0                                                                    | 6245.08875                   |
| 116     | Gala1-3Galb1-4Glc-Sp0                                                                                | 5418.57625                   |
| 569     | (3S)GlcAb1-3Galb1-4GlcNAcb1-3Galb1-4Glc-Sp0                                                          | 5133.6885                    |
| 561     | GlcNAcb1-3Galb1-4GlcNAcb1-6(GlcNAcb1-3Galb1-3)GalNAca-Sp14                                           | 5031.56975                   |
| 487     | Neu5Aca2-6Galb1-4GlcNAcb1-6(Fuca1-2Galb1-4(Fuca1-3)GlcNAcb1-3)Galb1-4Glc-Sp21                        | 4362.745                     |

**Figure S1.** Recognition of distinct carbohydrate-structures (glycans) by IgG antibodies in Privigen IVIG. **(A)** A total of 610 glycans were screened for binding of IgG in IgGPrepB by the glycan array CFG 5.1 as outlined in the Materials and Methods section. The carbohydrate structures of several of the top Privigen bound glycans are indicated as illustrative examples. **(B)** Results of top 20 glycans sorted by IgGPrepB ABR. RFU below the cut-off of the 95<sup>th</sup> percentile of the myeloma control were considered as negative and have been excluded from the table. Error bars represent s.e.m.

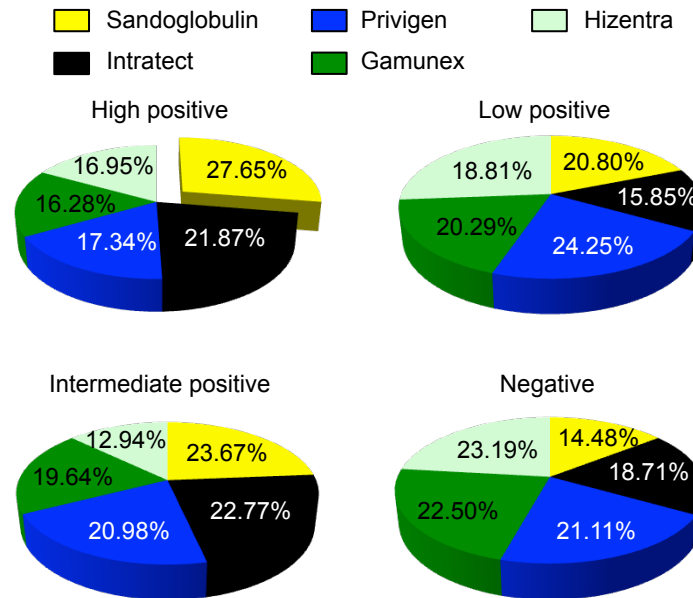

**Figure S2.** Relative distribution of negative, high-, low and intermediate positive bound glycans. Pie charts depicting the relative distribution of Sandoglobulin, Privigen, Hizentra, Intratect and Gamunex for negative, high-, intermediate-, and low positive bound glycans revealing a predominance of Sandoglobulin for high bound glycans. Categorized binding intensity was computed, as outlined in the Materials and methods section.

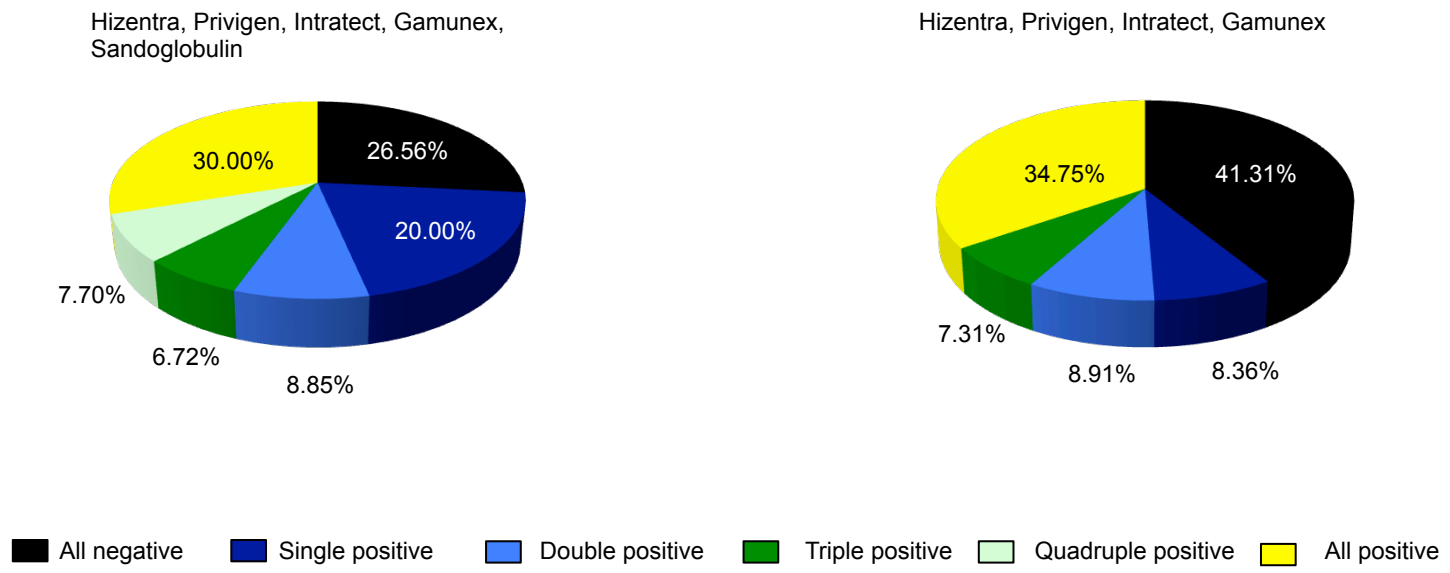

**Figure S3.** Similarities in glycan recognition among different IVIG preparations. Pie charts depicting the percentages of glycans recognized either by one (single positive), several or all preparations, including (left) or without (right) Sandoglobulin.

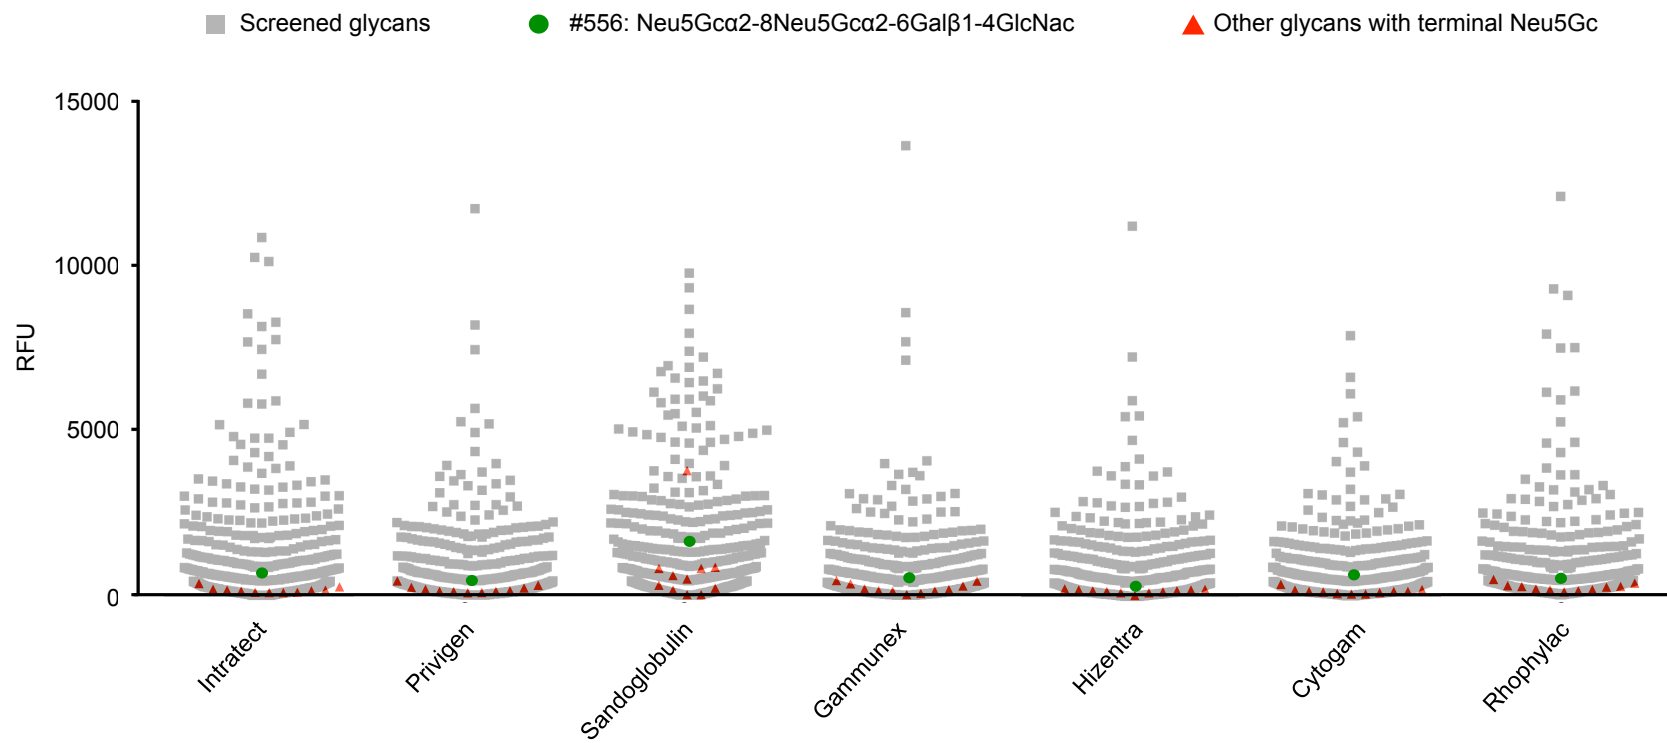

**Figure S4.** Immunogenicity of Neu5Gc-terminated glycans. Binding reactivities (RFU) of Sandoglobulin, Gammunex, Hizentra, Intratect, Privigen, Cytogam and Rhophylac to Neu5Gc-terminated carbohydrate structures (red or green).

**A**    Intratect    Privigen    Sandoglobulin    Gamunex    Hizentra    Cytogam    Rhophylac

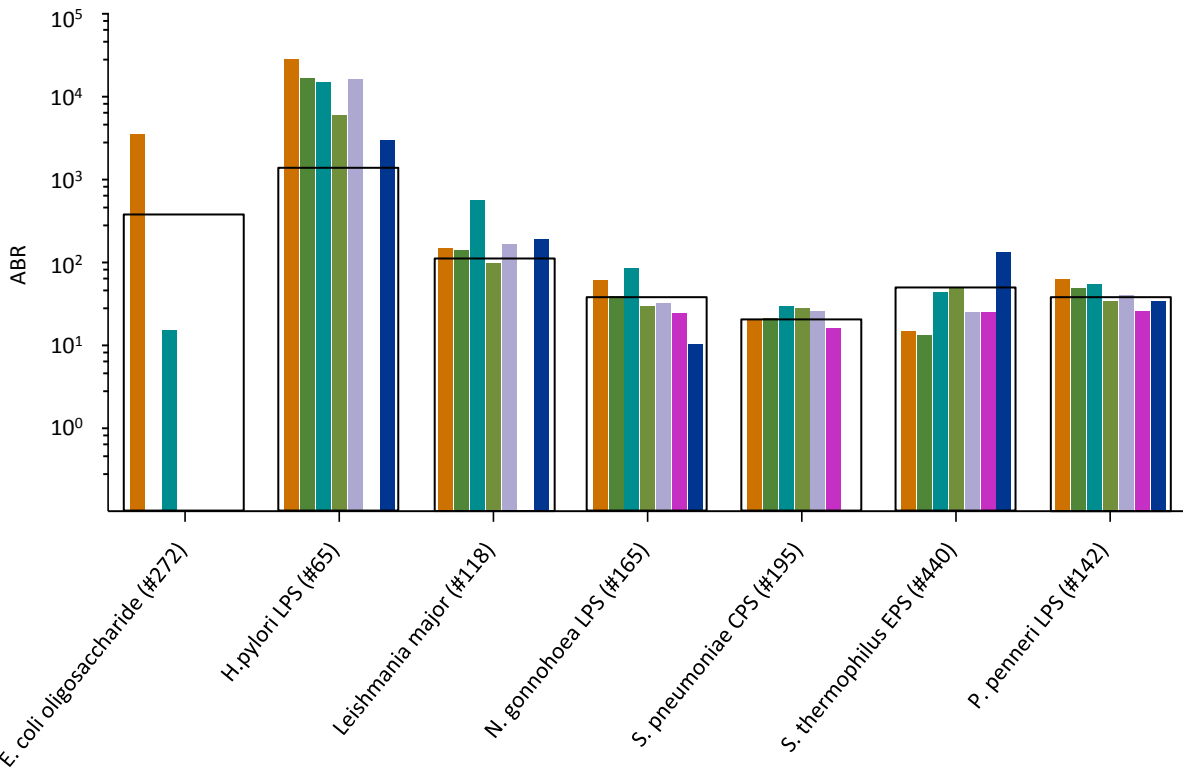

**B**

| The top 20 microorganism associated glycans bound by IVIG / SCIG |                                                      |           |                |          |                |          |                |          |                |          |                |          |                        |          |      |   |
|------------------------------------------------------------------|------------------------------------------------------|-----------|----------------|----------|----------------|----------|----------------|----------|----------------|----------|----------------|----------|------------------------|----------|------|---|
| Chart #                                                          | Glycan Name                                          | LPS / LOS |                | LTA      | CPS            |          | EPS            |          | Other          |          | Eukaryotic     |          | Predominant Ab Isotype |          |      |   |
|                                                                  |                                                      | gram -    | gram +         | gram +   | gram -         | gram +   | gram -         | gram +   | gram -         | Pathogen | Comm./Environ. | Pathogen | Comm./Environ.         | Non-IgG2 | IgG2 |   |
|                                                                  |                                                      | Pathogen  | Comm./Environ. | Pathogen | Comm./Environ. | Pathogen | Comm./Environ. | Pathogen | Comm./Environ. | Pathogen | Comm./Environ. | Pathogen | Comm./Environ.         |          |      |   |
| 562                                                              | GalNAcβ1-3GlcNAcβ-Sp0                                |           | x              |          |                |          |                |          |                |          |                |          |                        |          | x    |   |
| 65                                                               | Fuca1-2Galβ1-3GlcNAcβ1-3Galβ1-4Glcβ-Sp8              | x         |                |          |                |          |                |          |                |          |                |          |                        |          |      | x |
| 107                                                              | Galα1-3(Fuca1-2)Galb-Sp8                             |           |                |          |                |          |                |          |                | x        |                |          |                        |          |      | x |
| 190                                                              | GlcNAcβ1-4GlcNAcβ1-4GlcNAcβ1-4GlcNAcβ1-4GlcNAcβ1-Sp8 |           |                |          |                |          |                |          |                |          |                |          |                        |          | x    |   |
| 8                                                                | Rhaa-Sp8                                             |           | x              |          |                |          |                |          |                |          |                |          |                        |          |      |   |
| 145                                                              | Galβ1-3GalNAcβ1-4Galβ1-4Glcβ-Sp8                     | x         |                |          |                |          |                |          |                |          |                |          |                        |          |      |   |
| 118                                                              | Galα1-3Galb-Sp8                                      |           |                |          |                |          |                | x        |                |          |                | x        |                        |          |      | x |
| 122                                                              | Galα1-4Galβ1-4Glcβ-Sp0                               | x         | x              |          |                |          |                |          |                |          |                |          |                        |          |      | x |
| 66                                                               | Fuca1-2Galβ1-3GlcNAcβ1-3Galβ1-4Glcβ-Sp10             | x         |                |          |                |          |                |          |                |          |                |          |                        |          |      |   |
| 79                                                               | Fuca1-3GlcNAcβ-Sp8                                   | x         |                |          |                |          |                |          |                |          |                |          |                        |          |      |   |
| 108                                                              | Galα1-3(Fuca1-2)Galb-Sp18                            |           |                |          |                |          |                | x        |                |          |                |          |                        |          |      | x |
| 142                                                              | Galβ1-3GalNAcβ-Sp8                                   | x         | x              |          |                |          |                |          |                | x        |                |          |                        |          | x    |   |
| 165                                                              | Galβ1-4GlcNAcβ1-3Galβ1-4Glcβ-Sp8                     | x         | x              |          | x              |          |                |          |                |          |                |          |                        |          | x    |   |
| 100                                                              | Galα1-2Galb-Sp8                                      |           |                |          |                |          |                |          |                |          |                |          |                        |          |      |   |
| 115                                                              | Galα1-3Galb1-4GlcNAcb-Sp8                            |           | x              |          |                |          |                |          |                | x        |                |          | x                      |          |      | x |
| 264                                                              | Neu5Aca2-3Galb1-4Glcβ-Sp8                            | x         | x              |          |                |          |                |          |                |          |                |          |                        |          |      | x |
| 102                                                              | Galα1-3(Fuca1-2)Galβ1-3GlcNAcβ-Sp8                   | x         |                |          |                |          |                |          |                |          |                |          |                        |          | x    |   |
| 468                                                              | Galα1-3(Fuca1-2)Galb1-3GalNAcb-Sp8                   | x         |                |          |                |          |                |          |                |          |                |          |                        |          | x    |   |
| 179                                                              | GlcNAcβ1-3GalNAcα-Sp8                                | x         |                |          |                |          |                |          |                |          |                |          |                        |          |      | x |
| 448                                                              | Galβ1-4GlcNAcβ1-2Mana-Sp0                            |           | x              |          |                |          |                |          |                |          |                |          |                        |          | x    |   |

**Figure S5.** IgG binding to microorganism-associated carbohydrate structures. **(A)** Exemplary examples of ABR values for seven different glycans, associated with surface expression on microorganisms, in a grouped box plot for different IVIG and SCIG preparations. **(B)** The top 20 microorganism-associated glycans bound by IVIG/SCIG. Bacterial glycans were identified using the Bacterial Carbohydrate Structure Data Base (BCSDB). Abbreviations: CPS = capsular polysaccharides, EPS = exopolysaccharides, LPS = lipopolysaccharides, LOS = lipooligosaccharides, LTA = lipoteichoic acid, Comm. = commensal, Environ. = environmental, Ab = antibody

**Supplemental Table 1: Characteristics of immunoglobulin products used in the study**

| Product       | IgG2 content <sup>1)</sup> | Manufacturing processes: major purification steps                                      | Excipients              | Route Form        | Characteristics                              | Plasma origin; Donors per lot         | Manufacturer     |
|---------------|----------------------------|----------------------------------------------------------------------------------------|-------------------------|-------------------|----------------------------------------------|---------------------------------------|------------------|
| Intratect     | 37%                        | Cold ethanol fractionation, cation-exchange chromatography                             | Glycine                 | i.v. liquid       | Total serum IgG                              | na                                    | Biotest          |
| Privigen      | 28.7%                      | Cold ethanol fractionation, octanoic acid precipitation, anion-exchange chromatography | Proline                 | i.v. liquid       | Total serum IgG                              | EU <sup>2)</sup> , USA; 1000 - 60'000 | CSL Behring      |
| Hizentra      | 22-34%                     | Cold ethanol fractionation, octanoic acid precipitation, anion-exchange chromatography | Proline, polysorbate 80 | s.c. liquid       | Total serum IgG                              | EU <sup>2)</sup> , USA; 1000 - 60'000 | CSL Behring      |
| Gamunex       | 29.7%                      | Cold ethanol fractionation, caprylate precipitation, anion exchange chromatography     | Glycine                 | i.v. liquid       | Total serum IgG                              | na                                    | Grifols/Talecris |
| CytoGam       | 28%                        | Cold ethanol fractionation                                                             | Sucrose, albumin        | i.v. liquid       | Total IgG from anti-CMV enriched serum       | USA 1500-5000                         | CSL Behring      |
| Rhophylac     | 7.6%                       | Cation-exchange chromatography                                                         | Glycine, albumin, NaCl  | i.v.; i.m. liquid | Hyperimmune IgG anti-RhD blood group antigen | USA; <400                             | CSL Behring      |
| Sandoglobulin | 30.2%                      | Cold ethanol fractionation                                                             | Sucrose, NaCl           | i.v. lyophil.     | Total serum IgG                              | USA; >16'000                          | CSL Behring      |

<sup>1)</sup> Average IgG2 content as reported in Summary of Product Characteristics (SPC) documents or Product Insert leaflets of the various products

<sup>2)</sup> Austria, Switzerland, Germany

na; information not available

**Supplemental Table 2.** Comprehensive list of glycoforms bound by antibodies contained in IVIG. Results for each of the 610 glycoforms on the array and for 8 different IVIg preparations (Intratect, Privigen, Gamunex, Hizentra, CytoGam, Rhophylac, Sandoglobulin, IgG2-depl. Sandoglobulin) and 1 control mix IgG are shown. Displayed are average RFU and S.D. for each preparation (n=6 per preparation).

| Chart # | MasterList Name                              | Intratect |        | Privigen |       | Gamunex |       | Hizentra |       | CytoGam |       | Rhophylac |       | Sandoglobulin |       | IgG2 depl. |       | Control Mix |       |
|---------|----------------------------------------------|-----------|--------|----------|-------|---------|-------|----------|-------|---------|-------|-----------|-------|---------------|-------|------------|-------|-------------|-------|
|         |                                              | RFU       | S.D.   | RFU      | S.D.  | RFU     | S.D.  | RFU      | S.D.  | RFU     | S.D.  | RFU       | S.D.  | RFU           | S.D.  | RFU        | S.D.  | RFU         | S.D.  |
| 1       | Gala                                         | 1253.4    | 108.8  | 728.3    | 71.3  | 667.8   | 134.8 | 752.7    | 117.0 | 1062.6  | 58.2  | 1039.0    | 106.3 | 2273.6        | 392.5 | 177.7      | 80.8  | 136.7       | 18.7  |
| 2       | Neu5Ac                                       | 446.6     | 61.0   | 126.5    | 64.1  | 75.3    | 18.1  | 172.5    | 28.2  | 159.6   | 70.0  | 293.4     | 120.0 | 129.6         | 56.6  | 73.4       | 17.0  | 47.3        | 28.1  |
| 3       | Mana                                         | 292.9     | 26.0   | 374.1    | 50.0  | 108.6   | 61.8  | 314.6    | 90.3  | 236.4   | 55.0  | 278.4     | 5.8   | 315.7         | 240.0 | 154.0      | 24.8  | 71.6        | 24.2  |
| 4       | GalNAc                                       | 392.4     | 119.0  | 144.6    | 14.0  | 302.3   | 101.6 | 106.5    | 24.4  | 163.2   | 63.0  | 230.4     | 90.7  | 194.0         | 73.1  | 66.6       | 15.5  | 26.3        | 14.2  |
| 5       | Fuca                                         | 613.7     | 20.2   | 501.6    | 43.8  | 289.1   | 61.7  | 133.7    | 29.7  | 398.7   | 144.9 | 731.4     | 22.1  | 332.3         | 62.2  | 253.5      | 70.4  | 191.1       | 102.5 |
| 6       | Fuca                                         | 633.7     | 33.3   | 354.7    | 79.6  | 510.9   | 49.4  | 290.8    | 110.6 | 576.6   | 54.1  | 1038.9    | 73.8  | 283.3         | 97.3  | 161.0      | 37.1  | 43.3        | 30.9  |
| 7       | Fuca                                         | 239.5     | 73.6   | 244.3    | 25.9  | 81.7    | 30.3  | 150.7    | 76.4  | 368.3   | 93.2  | 269.1     | 82.8  | 352.4         | 64.3  | 162.4      | 84.4  | 20.4        | 30.7  |
| 8       | Neu5Ac                                       | 8646.4    | 488.5  | 7429.8   | 284.4 | 7684.5  | 270.7 | 7270.2   | 234.3 | 6094.0  | 399.2 | 7458.4    | 782.0 | 6022.8        | 611.7 | 3362.7     | 638.4 | 45.4        | 39.8  |
| 9       | Neu5Ac                                       | 698.6     | 133.1  | 374.0    | 63.8  | 189.8   | 63.4  | 331.9    | 58.3  | 280.9   | 91.5  | 271.5     | 42.3  | 94.9          | 36.0  | 298.1      | 17.4  | 131.9       | 43.6  |
| 10      | Neu5Ac                                       | 87.7      | 15.5   | 111.1    | 14.5  | 110.1   | 54.5  | 75.0     | 38.0  | 109.6   | 25.0  | 109.0     | 25.7  | 43.9          | 67.8  | 28.8       | 2.6   | 2.9         | 19.0  |
| 11      | Neu5Ac                                       | 1180.1    | 103.8  | 1349.8   | 126.8 | 616.1   | 38.1  | 1060.8   | 66.8  | 939.9   | 119.2 | 503.4     | 25.7  | 1335.3        | 247.1 | 518.9      | 131.2 | 75.6        | 7.0   |
| 12      | Gal1-3                                       | 241.0     | 91.3   | 1109.4   | 231.3 | 135.1   | 107.3 | 51.7     | 99.8  | 43.1    | 350.6 | 339.8     | 392.3 | 85.3          | 44.5  | 21.2       | 118.1 | 34.3        | 38.6  |
| 13      | Glc3                                         | 125.4     | 75.3   | 0.0      | 0.0   | 16.1    | 60.5  | 7.9      | 41.1  | 14.3    | 31.8  | 18.2      | 0.0   | 53.9          | 20.3  | 14.1       | 3.3   | 38.6        | 0.0   |
| 14      | Manb                                         | 535.7     | 43.7   | 63.9     | 23.3  | 57.7    | 12.9  | 156.3    | 46.7  | 160.9   | 25.7  | 376.2     | 139.1 | 6.2           | 26.2  | 58.8       | 38.6  | 75.3        | 21.7  |
| 15      | GlcNAc                                       | 615.0     | 71.3   | 61.0     | 29.2  | 208.3   | 34.7  | 20.8     | 68.3  | 77.5    | 35.1  | 50.5      | 0.0   | 43.6          | 17.2  | 20.0       | 11.0  | 35.7        | 38.7  |
| 16      | GlcNAc                                       | 711.6     | 59.2   | 176.5    | 93.5  | 23.6    | 7.5   | 0.0      | 202.2 | 157.2   | 45.9  | 829.9     | 289.2 | 287.6         | 65.4  | 115.2      | 48.6  | 114.4       | 44.8  |
| 17      | GlcNAc                                       | 758.9     | 122.7  | 355.9    | 96.7  | 455.1   | 67.0  | 299.3    | 179.4 | 491.5   | 69.9  | 1593.7    | 321.3 | 396.3         | 62.6  | 113.2      | 108.7 | 11.2        | 11.6  |
| 18      | GlcNAc                                       | 430.5     | 125.0  | 317.2    | 78.3  | 73.2    | 21.4  | 13.6     | 48.8  | 290.6   | 28.8  | 582.0     | 124.5 | 335.1         | 71.2  | 108.1      | 26.3  | 274.4       | 45.0  |
| 19      | Gal1-4GlcNAc                                 | 24.7      | 11.1   | 0.0      | 23.4  | 48.8    | 32.0  | 92.6     | 99.6  | 83.9    | 61.6  | 82.7      | 35.7  | 20.6          | 40.3  | 24.6       | 23.0  | 63.4        | 58.9  |
| 20      | Gal1-4GlcNAc                                 | 559.8     | 150.5  | 383.7    | 40.7  | 149.0   | 85.3  | 287.9    | 32.5  | 624.9   | 42.9  | 503.6     | 36.6  | 558.4         | 83.0  | 361.3      | 30.3  | 153.4       | 16.1  |
| 21      | GlcNAc1-6GlcNAc                              | 581.1     | 496.0  | 2087.9   | 267.2 | 4962.4  | 233.2 | 2244.4   | 85.2  | 1429.4  | 83.6  | 971.4     | 31.6  | 3103.2        | 769.0 | 372.3      | 100.0 | 16.1        | 8.4   |
| 22      | RS(3S)Gal1-4GlcNAc                           | 241.0     | 91.3   | 1109.4   | 231.3 | 135.1   | 107.3 | 51.7     | 99.8  | 43.1    | 350.6 | 339.8     | 392.3 | 85.3          | 44.5  | 21.2       | 118.1 | 34.3        | 38.6  |
| 23      | RS(3S)Gal1-4GlcNAc                           | 262.6     | 66.2   | 275.3    | 11.8  | 319.6   | 36.9  | 173.2    | 14.2  | 359.1   | 42.7  | 799.1     | 120.8 | 175.1         | 48.1  | 109.8      | 26.3  | 86.9        | 12.7  |
| 24      | (3S)Gal1-4(Fuca1-3)6S(Glc                    | 365.9     | 53.0   | 441.0    | 91.9  | 391.2   | 21.8  | 399.6    | 32.7  | 347.8   | 37.8  | 432.8     | 47.8  | 629.2         | 626.8 | 128.9      | 18.8  | 156.2       | 23.2  |
| 25      | (3S)Gal1-4(Glc                               | 607.8     | 72.1   | 259.6    | 49.5  | 173.6   | 59.8  | 206.4    | 41.3  | 358.9   | 76.5  | 386.0     | 81.9  | 354.0         | 71.3  | 103.2      | 20.0  | 124.1       | 14.1  |
| 26      | (3S)Gal1-4(6S)Glc                            | 584.0     | 64.5   | 29.2     | 19.7  | 19.7    | 33.2  | 68.3     | 19.3  | 68.3    | 19.3  | 68.3      | 19.3  | 68.3          | 19.3  | 68.3       | 19.3  | 68.3        | 19.3  |
| 27      | (3S)Gal1-4(6S)Glc                            | 879.9     | 56.1   | 380.0    | 28.8  | 472.1   | 55.2  | 436.0    | 100.0 | 583.4   | 36.4  | 639.2     | 17.4  | 727.6         | 63.8  | 241.6      | 42.7  | 10.2        | 19.2  |
| 28      | (3S)Gal1-3(Fuca1-4)GlcNAc                    | 157.7     | 30.3   | 139.2    | 13.3  | 199.4   | 100.2 | 28.8     | 174.1 | 152.7   | 25.4  | 348.7     | 11.2  | 27.2          | 19.1  | 102.3      | 9.2   | 23.1        | 17.7  |
| 29      | (3S)Gal1-3GlcNAc                             | 227.3     | 39.5   | 181.9    | 30.8  | 207.9   | 61.1  | 193.1    | 53.3  | 164.8   | 61.1  | 193.1     | 53.3  | 164.8         | 61.1  | 193.1      | 53.3  | 164.8       | 61.1  |
| 30      | (3S)Gal1-3GlcNAc                             | 4773.0    | 621.7  | 2137.0   | 355.6 | 1786.4  | 221.7 | 1606.7   | 482.3 | 1430.0  | 157.8 | 3300.6    | 508.5 | 1851.8        | 249.0 | 1623.1     | 311.3 | 0.1         | 15.8  |
| 31      | (3S)Gal1-3GlcNAc                             | 2829.8    | 1525.1 | 1971.0   | 17.2  | 1234.4  | 41.3  | 2212.0   | 235.2 | 2099.4  | 73.3  | 2902.4    | 289.3 | 3590.0        | 754.7 | 2301.5     | 110.9 | 29.8        | 26.6  |
| 32      | (3S)Gal1-4(Fuca1-3)GlcNAc                    | 220.0     | 37.2   | 214.8    | 28.5  | 286.5   | 37.2  | 214.8    | 28.5  | 286.5   | 37.2  | 214.8     | 28.5  | 286.5         | 37.2  | 214.8      | 28.5  | 286.5       | 37.2  |
| 33      | (3S)Gal1-4(Fuca1-3)GlcNAc                    | 302.0     | 49.6   | 380.8    | 49.8  | 182.2   | 66.7  | 176.4    | 60.9  | 177.7   | 60.9  | 177.7     | 60.9  | 177.7         | 60.9  | 177.7      | 60.9  | 177.7       | 60.9  |
| 34      | (3S)Gal1-4(6S)GlcNAc                         | 400.9     | 35.2   | 351.9    | 59.8  | 288.1   | 48.8  | 386.6    | 107.5 | 432.5   | 37.3  | 615.7     | 61.3  | 324.2         | 103.2 | 117.8      | 48.7  | 18.1        | 42.8  |
| 35      | (3S)Gal1-4(6S)GlcNAc                         | 397.2     | 111.8  | 327.7    | 56.3  | 198.0   | 41.0  | 264.8    | 21.3  | 215.7   | 165.9 | 550.8     | 88.0  | 414.4         | 82.0  | 113.4      | 22.0  | 73.2        | 14.2  |
| 36      | (3S)Gal1-4(GlcNAc                            | 697.5     | 68.0   | 519.1    | 63.8  | 507.9   | 63.1  | 532.8    | 116.8 | 618.3   | 63.8  | 519.1     | 63.8  | 507.9         | 63.8  | 519.1      | 63.8  | 507.9       | 63.8  |
| 37      | (3S)Gal1-4GlcNAc                             | 73.2      | 24.4   | 46.1     | 17.0  | 46.1    | 17.0  | 46.1     | 17.0  | 46.1    | 17.0  | 46.1      | 17.0  | 46.1          | 17.0  | 46.1       | 17.0  | 46.1        | 17.0  |
| 38      | (3S)Gal1-4GlcNAc                             | 228.3     | 47.7   | 74.2     | 23.6  | 48.8    | 20.7  | 79.7     | 39.7  | 153.8   | 39.6  | 430.9     | 87.6  | 0.0           | 8.8   | 73.0       | 36.1  | 117.6       | 20.2  |
| 39      | (3S)Gal1-4GlcNAc                             | 242.0     | 90.7   | 591.8    | 67.4  | 366.0   | 19.9  | 404.4    | 18.7  | 404.4   | 18.7  | 404.4     | 18.7  | 404.4         | 18.7  | 404.4      | 18.7  | 404.4       | 18.7  |
| 40      | (4S)Gal1-4GlcNAc                             | 1727.8    | 34.4   | 249.1    | 29.2  | 20.2    | 8.9   | 86.2     | 35.7  | 285.2   | 42.6  | 319.7     | 7.7   | 21.5          | 35.8  | 50.0       | 13.4  | 17.5        | 35.7  |
| 41      | (6P)Mana                                     | 742.1     | 128.8  | 485.7    | 72.3  | 467.4   | 44.3  | 238.8    | 172.3 | 380.4   | 70.1  | 556.8     | 59.3  | 663.3         | 21.2  | 142.8      | 22.1  | 67.1        | 18.9  |
| 42      | (6S)Gal1-4Glc                                | 386.1     | 98.8   | 209.3    | 70.1  | 104.2   | 11.5  | 128.4    | 56.8  | 306.3   | 62.2  | 643.2     | 482.3 | 286.6         | 34.6  | 38.1       | 31.9  | 215.0       | 94.4  |
| 43      | (6S)Gal1-4Glc                                | 122.0     | 30.7   | 591.8    | 67.4  | 366.0   | 19.9  | 404.4    | 18.7  | 404.4   | 18.7  | 404.4     | 18.7  | 404.4         | 18.7  | 404.4      | 18.7  | 404.4       | 18.7  |
| 44      | (6S)Gal1-4Glc                                | 11.1      | 21.6   | 73.2     | 18.8  | 11.1    | 21.6  | 73.2     | 18.8  | 11.1    | 21.6  | 73.2      | 18.8  | 11.1          | 21.6  | 73.2       | 18.8  | 11.1        | 21.6  |
| 45      | (6S)Gal1-4(6S)Glc                            | 540.4     | 80.4   | 439.7    | 59.2  | 331.5   | 65.0  | 798.9    | 219.2 | 503.9   | 31.8  | 720.3     | 70.9  | 489.9         | 115.4 | 137.2      | 50.8  | 61.8        | 23.2  |
| 46      | (6S)Gal1-4(6S)Glc                            | 831.3     | 137.9  | 444.0    | 73.5  | 457.6   | 40.4  | 572.1    | 188.9 | 561.4   | 74.6  | 1193.7    | 148.3 | 687.1         | 60.2  | 118.5      | 48.5  | 28.6        | 25.2  |
| 47      | (6S)Gal1-4(6S)Glc                            | 58.6      | 25.0   | 20.0     | 34.8  | 111.5   | 39.2  | 26.5     | 32.6  | 238.3   | 144.4 | 243.9     | 45.5  | 1002.4        | 24.8  | 32.4       | 18.5  | 4.9         | 12.6  |
| 48      | (6S)Gal1-4(6S)Glc                            | 168.3     | 30.3   | 159.5    | 27.7  | 91.4    | 41.6  | 402.5    | 93.7  | 66.1    | 16.8  | 113.5     | 38.2  | 14.0          | 21.5  | 63.6       | 13.9  | 37.1        | 8.0   |
| 49      | Man1-6(Man1-3)Man1-4GlcNAc                   | 698.6     | 90.5   | 616.8    | 60.0  | 616.8   | 60.0  | 616.8    | 60.0  | 616.8   | 60.0  | 616.8     | 60.0  | 616.8         | 60.0  | 616.8      | 60.0  | 616.8       | 60.0  |
| 50      | Man1-6(Man1-3)Man1-4GlcNAc                   | 335.4     | 61.5   | 298.7    | 19.4  | 189.0   | 45.2  | 864.6    | 732.4 | 237.5   | 80.2  | 218.2     | 38.7  | 255.3         | 132.2 | 171.1      | 0.8   | 165.6       | 51.7  |
| 51      | Man1-6(Man1-3)Man1-4GlcNAc                   | 92.6      | 46.0   | 0.0      | 9.3   | 55.3    | 51.2  | 37.0     | 37.9  | 91.8    | 39.4  | 137.0     | 26.6  | 67.2          | 41.0  | 46.6       | 14.6  | 26.8        | 17.9  |
| 52      | GlcNAc1-2Man1-6(GlcNAc1-2Man1-3)Man1-4GlcNAc | 180.8     | 58.1   | 156.6    | 15.9  | 91.9    | 29.4  | 244.1    | 89.1  | 94.0    | 14.9  | 128.7     | 24.2  | 93.0          | 32.2  | 139.3      | 40.0  | 71.5        | 18.7  |
| 53      | GlcNAc1-2Man1-6(GlcNAc1-2Man1-3)Man1-4GlcNAc | 111.3     | 58.9   | 0.8      | 34.7  | 150.2   | 34.2  | 99.4     | 47.3  | 221.4   | 96.6  | 223.8     | 23.9  | 120.1         | 44.9  | 81.0       | 51.9  | 45.9        | 15.5  |
| 54      | GlcNAc1-2Man1-6(GlcNAc1-2Man1-3)Man1-4GlcNAc | 66.5      | 30.6   | 111.7    | 51.6  | 139.5   | 38.5  | 129.4    | 62.9  | 80.5    | 34.0  | 118.4     | 69.8  | 267.1         | 321.8 | 6.8        | 50.0  | 58.5        | 21.6  |
| 55      | Neu5Ac2-6Gal1-4GlcNAc                        | 170.8     | 12.8   | 98.3     | 24.4  | 344.7   | 248.0 | 126.9    | 13.7  | 100.9   | 32.5  | 205.2     | 46.1  | 82.6          | 57.0  | 41.6       | 29.1  | 33.0        | 9.4   |
| 56      | Neu5Ac2-6Gal1-4GlcNAc                        | 28.7      | 42.6   | 111.1    | 51.4  | 123.4   | 13.5  | 384.3    | 277.0 | 99.0    | 24.0  | 149.0     | 82.8  | 290.5         | 89.8  | 84.5       | 34.9  | 128.3       | 18.7  |
| 57      | Neu5Ac2-6Gal1-4GlcNAc                        | 464.3     | 41.4   | 326.7    | 62.1  | 163.8   | 22.3  | 172.0    | 56.8  | 225.0   | 67.6  | 374.4     | 42.1  | 472.2         | 32.1  | 121.5      | 54.4  | 30.0        | 19.0  |
| 58      | Fuca1-2Gal1-3GalNAc1-3Gal1-4Gal1-4Glc        | 1664.9    | 41.8   | 1039.7   | 168.8 | 924.0   | 198.8 | 1250.6   | 63.4  | 851.8   | 121.2 | 1858.3    | 74.8  | 975.1         | 210.7 | 165.4      | 38.0  | 50.2        | 13.6  |
| 59      | Fuca1-2Gal1-3GalNAc1-3Gal1-4Gal1-4Glc        | 86.5      | 59.5   | 24.3     | 17.1  | 86.5    | 59.5  | 24.3     | 17.1  | 86.5    | 59.5  | 24.3      | 17.1  | 86.5          | 59.5  | 24.3       | 17.1  | 86.5        | 59.5  |
| 60      | Fuca1-2Gal1-3GalNAc1-3Gal1-4Gal1-4Glc        | 97.0      | 38.0   | 30.3     | 12.4  | 31.6    | 18.3  | 57.4     | 14.8  | 49.1    | 20.3  | 68.2      | 212.4 | 6.4           | 16.2  | 94.4       | 40.0  | 110.5       | 39.2  |
| 61      | Fuca1-2Gal1-3GalNAc1-3                       |           |        |          |       |         |       |          |       |         |       |           |       |               |       |            |       |             |       |

Supplemental Table 2. (Continued)

|       |                                                                       |         |       |        |        |        |        |        |       |        |        |        |        |        |        |        |       |       |       |     |
|-------|-----------------------------------------------------------------------|---------|-------|--------|--------|--------|--------|--------|-------|--------|--------|--------|--------|--------|--------|--------|-------|-------|-------|-----|
| 137   | NeuAc2-6(Gal1-3)GalNAc4                                               | 119     | 19.0  | 15.3   | 10.0   | 34.1   | 13.0   | 62.1   | 21.2  | 38.2   | 26.0   | 55.1   | 25.4   | 0.0    | 56.3   | 44.2   | 27.1  | 5.0   | 15.2  |     |
| 138   | NeuAc2-6(Gal1-3)GlcNAc1-4Gal1-4Glc                                    | 166     | 64.5  | 152.1  | 61.1   | 170.0  | 40.3   | 91.4   | 33.8  | 151.1  | 27.6   | 98.8   | 52.5   | 561.0  | 141.8  | 6.9    | 25.3  | 4.2   | 24.7  |     |
| 139   | Gal1-3GalNAc4                                                         | 69      | 31.5  | 42.7   | 13.8   | 18.0   | 15.5   | 22.3   | 21.4  | 32.8   | 10.8   | 44.6   | 15.4   | 15.4   | 61.8   | 59.5   | 9.4   | 0.1   | 11.6  |     |
| 140   | Gal1-3GalNAc4                                                         | 125     | 53.4  | 155.3  | 57.6   | 103.4  | 16.8   | 146.6  | 68.3  | 109.6  | 49.8   | 225.1  | 220.1  | 733.4  | 33.1   | 0.0    | 138.3 | 44.7  | 17.9  |     |
| 141   | Gal1-3GalNAc4                                                         | 120     | 24.1  | 159.5  | 189.3  | 46.0   | 15.9   | 75.5   | 57.8  | 16.2   | 18.2   | 88.3   | 60.0   | 425.0  | 57.3   | 74.1   | 24.3  | 1.2   | 31.3  |     |
| 142   | Gal1-3GalNAc4                                                         | 2470    | 71.5  | 191.1  | 35.5   | 1370.2 | 97.1   | 1596.7 | 21.3  | 1033.2 | 51.8   | 1355.3 | 109.4  | 2174.6 | 240.1  | 1477.8 | 119.3 | 39.8  | 21.8  |     |
| 143   | Gal1-3GalNAc1-3Gal1-4Gal1-4Glc                                        | 1107.1  | 107.5 | 92.8   | 60.7   | 1298.1 | 119.9  | 68.8   | 892.3 | 36.2   | 2269.3 | 193.7  | 3045.7 | 189.2  | 291.3  | 39.7   | 2.5   | 25.1  |       |     |
| 144   | Gal1-3GalNAc1-4NeuAc2-3Gal1-4Glc                                      | 254.3   | 57.1  | 287.7  | 28.3   | 270.2  | 71.4   | 175.7  | 37.9  | 203.0  | 47.3   | 288.3  | 104.3  | 178.3  | 21.4   | 123.1  | 23.8  | 0.1   | 4.5   |     |
| 145   | Gal1-3GalNAc1-4Gal1-4Glc                                              | 2325.4  | 87.5  | 1896.7 | 192.4  | 1647.4 | 109.1  | 2013.3 | 178.8 | 1283.2 | 99.8   | 970.3  | 124.1  | 2578.4 | 148.5  | 663.4  | 66.6  | 5.2   | 48.4  |     |
| 146   | Gal1-3GalNAc1-4Glc                                                    | 234.0   | 39.3  | 239.3  | 32.3   | 229.5  | 4.5    | 259.6  | 6.8   | 157.8  | 9.8    | 157.8  | 9.8    | 157.8  | 9.8    | 157.8  | 9.8   | 157.8 | 9.8   |     |
| 147   | Gal1-3GlcNAc1-3Gal1-4GlcNAc                                           | 151.4   | 20.3  | 74.3   | 53.9   | 49.0   | 42.4   | 40.4   | 22.8  | 26.7   | 16.3   | 19.7   | 11.2   | 87.7   | 22.0   | 0.0    | 38.0  | 0.1   | 19.7  |     |
| 148   | Gal1-3GlcNAc1-3Gal1-4Glc                                              | 1023.0  | 86.4  | 679.3  | 86.7   | 763.8  | 105.7  | 843.2  | 30.9  | 567.9  | 78.8   | 237.7  | 39.1   | 271.5  | 230.6  | 376.3  | 31.9  | 6.3   | 11.6  |     |
| 149   | Gal1-3GlcNAc1-3Gal1-4Glc                                              | 101.9   | 39.3  | 78.7   | 54.4   | 101.2  | 32.4   | 14.7   | 45.3  | 75.1   | 29.4   | 54.5   | 17.8   | 175.4  | 154.5  | 10.0   | 46.0  | 22.6  | 6.8   |     |
| 150   | Gal1-3GlcNAc1-3Gal1-4Glc                                              | 107.8   | 47.2  | 82.3   | 11.3   | 113.2  | 40.2   | 137.3  | 74.9  | 183.2  | 82.5   | 361.2  | 120.3  | 3162.7 | 191.8  | 68.8   | 8.9   | 4.6   | 12.7  |     |
| 151   | Gal1-4(Fuca1-3)GlcNAc                                                 | 101.0   | 16.6  | 53.2   | 14.3   | 140.8  | 84.3   | 13.0   | 28.4  | 71.8   | 24.5   | 133.5  | 35.9   | 148.7  | 81.0   | 48.8   | 9.1   | 0.1   | 15.6  |     |
| 152   | Gal1-4(Fuca1-3)GlcNAc                                                 | 93.7    | 99.5  | 135.4  | 22.7   | 244.8  | 166.4  | 69.9   | 138.3 | 79.0   | 199.3  | 75.0   | 0.0    | 147.1  | 72.8   | 12.3   | 22.2  | 19.8  | 11.8  |     |
| 153   | Gal1-4(Fuca1-3)GlcNAc1-3Gal1-4(Fuca1-3)GlcNAc                         | 885.6   | 55.4  | 671.2  | 38.3   | 831.9  | 74.2   | 414.6  | 60.6  | 787.9  | 32.3   | 841.2  | 81.5   | 744.9  | 58.8   | 470.3  | 85.5  | 54.7  | 29.5  |     |
| 154   | Gal1-4(Fuca1-3)GlcNAc1-3Gal1-4(Fuca1-3)GlcNAc1-3Gal1-4(Fuca1-3)GlcNAc | 128.1   | 60.2  | 297.4  | 42.2   | 328.8  | 29.9   | 240.8  | 74.5  | 482.3  | 67.0   | 180.1  | 35.1   | 463.6  | 81.0   | 57.1   | 31.0  | 33.0  | 30.4  |     |
| 155   | Gal1-4(Fuca1-3)GlcNAc                                                 | 380.3   | 73.3  | 550.2  | 43.3   | 758.6  | 126.0  | 478.7  | 88.3  | 705.0  | 81.1   | 1119.4 | 56.9   | 1969.3 | 203.1  | 99.3   | 26.7  | 92.5  | 27.7  |     |
| 156   | Gal1-4(Fuca1-3)GlcNAc                                                 | 545.8   | 72.0  | 612.3  | 68.1   | 680.1  | 51.3   | 375.3  | 113.9 | 969.3  | 15.6   | 713.4  | 50.2   | 1310.9 | 216.8  | 128.1  | 59.4  | 59.5  | 51.8  |     |
| 157   | Gal1-4(Fuca1-3)GlcNAc1-3Gal1-4GlcNAc                                  | 0.0     | 23.4  | 0.0    | 47.9   | 0.0    | 13.0   | 44.1   | 20.4  | 3.5    | 6.3    | 0.0    | 22.4   | 20.5   | 24.3   | 0.0    | 8.7   | 17.0  | 11.8  |     |
| 158   | Gal1-4(Fuca1-3)GlcNAc1-3Gal1-4GlcNAc                                  | 44.7    | 151.3 | 0.0    | 45.8   | 0.0    | 15.7   | 3.7    | 8.5   | 35.1   | 16.7   | 163.6  | 81.8   | 0.0    | 13.7   | 51.7   | 17.8  | 65.5  | 46.7  |     |
| 159   | Gal1-4(Fuca1-3)GlcNAc1-3Gal1-4GlcNAc                                  | 31.3    | 14.2  | 121.4  | 10.2   | 14.7   | 11.6   | 41.4   | 26.9  | 34.9   | 8.0    | 58.9   | 37.4   | 21.1   | 33.0   | 28.1   | 28.2  | 27.2  | 17.4  |     |
| 160   | Gal1-4(Fuca1-3)GlcNAc1-3Gal1-4GlcNAc                                  | 0.0     | 10.9  | 25.9   | 16.9   | 16.4   | 15.8   | 19.0   | 14.2  | 83.5   | 28.1   | 107.6  | 45.2   | 92.8   | 22.7   | 88.0   | 50.7  | 137.0 | 58.3  |     |
| 161   | Gal1-4(Fuca1-3)GlcNAc1-3Gal1-4(Fuca1-3)GlcNAc1-3Gal1-4(Fuca1-3)GlcNAc | 169.4   | 41.6  | 110.8  | 38.3   | 162.7  | 36.0   | 0.0    | 62.3  | 186.0  | 52.8   | 123.6  | 37.2   | 249.4  | 55.6   | 62.4   | 50.2  | 41.8  | 25.6  |     |
| 162   | Gal1-4GlcNAc1-3Gal1-4GlcNAc1-3Gal1-4GlcNAc                            | 83.4    | 61.7  | 58.4   | 7.6    | 23.6   | 15.7   | 20.5   | 14.8  | 85.8   | 28.2   | 77.5   | 19.4   | 140.3  | 21.7   | 46.2   | 5.5   | 146.0 | 30.0  |     |
| 163   | Gal1-4GlcNAc1-3Gal1-4GlcNAc                                           | 70.8    | 34.0  | 114.7  | 12.7   | 111.7  | 38.1   | 155.8  | 67.7  | 95.5   | 53.1   | 108.8  | 25.3   | 3006.4 | 3518.7 | 23.6   | 32.6  | 10.6  | 19.0  |     |
| 164   | Gal1-4GlcNAc1-3Gal1-4GlcNAc                                           | 103.8   | 33.8  | 103.8  | 15.4   | 65.4   | 11.6   | 65.4   | 11.6  | 65.4   | 11.6   | 65.4   | 11.6   | 65.4   | 11.6   | 65.4   | 11.6  | 65.4  | 11.6  |     |
| 165   | Gal1-4GlcNAc1-3Gal1-4GlcNAc                                           | 3452.1  | 190.2 | 221.2  | 280.3  | 1640.4 | 155.8  | 1819.8 | 386.3 | 1396.3 | 175.2  | 573.6  | 73.8   | 4717.3 | 484.7  | 1059.2 | 56.9  | 6.9   | 16.6  |     |
| 166   | Gal1-4GlcNAc1-6(Gal1-3)GalNAc4                                        | 226.9   | 23.1  | 297.9  | 41.7   | 131.8  | 16.7   | 276.2  | 109.2 | 269.7  | 35.7   | 330.6  | 94.1   | 6244.6 | 1436.0 | 60.2   | 9.2   | 16.9  | 25.9  |     |
| 167   | Gal1-4GlcNAc1-6(Gal1-3)GalNAc4                                        | 539.9   | 95.3  | 571.8  | 61.1   | 390.7  | 38.8   | 376.5  | 199.0 | 487.4  | 39.6   | 428.7  | 44.4   | 692.2  | 86.2   | 215.8  | 33.3  | 25.1  | 30.0  |     |
| 168   | Gal1-4GlcNAc1-6(Gal1-3)GalNAc4                                        | 251.4   | 61.0  | 246.3  | 36.8   | 239.9  | 12.3   | 189.4  | 101.6 | 481.9  | 80.4   | 481.9  | 80.4   | 481.9  | 80.4   | 481.9  | 80.4  | 481.9 | 80.4  |     |
| 169   | Gal1-4GlcNAc1-6(Gal1-3)GalNAc4                                        | 167.7   | 34.9  | 111.2  | 50.7   | 69.1   | 25.8   | 74.3   | 19.6  | 64.5   | 39.5   | 106.4  | 39.7   | 264.3  | 84.8   | 10.9   | 21.6  | 0.1   | 17.2  |     |
| 170   | Gal1-4GlcNAc1-6(Gal1-3)GalNAc4                                        | 2319.0  | 996.5 | 1573.0 | 132.8  | 1634.1 | 81.0   | 1137.5 | 234.1 | 2141.2 | 82.2   | 3827.7 | 442.2  | 6765.2 | 297.3  | 665.5  | 121.9 | 30.2  | 16.8  |     |
| 171   | Gal1-4GlcNAc1-6(Gal1-3)GalNAc4                                        | 846.5   | 171.3 | 680.7  | 74.3   | 867.8  | 126.6  | 500.1  | 244.8 | 650.8  | 89.1   | 6113.4 | 1208.7 | 2103.7 | 1366.2 | 213.8  | 40.7  | 21.5  | 18.1  |     |
| 172   | Gal1-4GlcNAc1-6(Gal1-3)GalNAc4                                        | 4932.2  | 116.9 | 203.4  | 63.4   | 624.8  | 94.8   | 1922.5 | 40.2  | 2139.8 | 194.4  | 1511.5 | 157.2  | 1969.3 | 137.2  | 694.2  | 39.6  | 14.2  | 19.1  |     |
| 173   | Gal1-4GlcNAc1-6(Gal1-3)GalNAc4                                        | 176.3   | 71.7  | 106.3  | 28.7   | 133.2  | 73.3   | 93.6   | 125.4 | 234.6  | 27.3   | 178.9  | 38.8   | 1567.9 | 95.1   | 7.0    | 22.0  | 25.4  | 5.2   |     |
| 174   | Gal1-4GlcNAc1-6(Gal1-3)GalNAc4                                        | 236.4   | 48.7  | 629.8  | 45.2   | 717.6  | 47.8   | 600.5  | 54.8  | 1499.9 | 84.6   | 1304.9 | 90.1   | 811.7  | 118.0  | 142.7  | 15.4  | 121.8 | 60.3  |     |
| 175   | Gal1-4GlcNAc1-6(Gal1-3)GalNAc4                                        | 0.0     | 0.2   | 0.0    | 0.0    | 0.0    | 0.0    | 0.0    | 0.0   | 0.0    | 0.0    | 0.0    | 0.0    | 0.0    | 0.0    | 0.0    | 0.0   | 0.0   | 0.0   |     |
| 176   | Gal1-4GlcNAc1-6(Gal1-3)GalNAc4                                        | 1136.3  | 29.5  | 1020.7 | 62.2   | 926.6  | 73.8   | 400.8  | 105.6 | 1114.8 | 61.2   | 320.5  | 50.9   | 1878.2 | 248.8  | 148.8  | 21.2  | 60.1  | 20.9  |     |
| 177   | Gal1-4GlcNAc1-6(Gal1-3)GalNAc4                                        | 180.0   | 0.0   | 34.8   | 0.0    | 18.4   | 0.0    | 18.0   | 46.9  | 15.1   | 14.0   | 26.8   | 26.0   | 20.1   | 0.5    | 48.0   | 13.1  | 7.8   | 0.1   | 8.2 |
| 178   | Gal1-4GlcNAc1-6(Gal1-3)GalNAc4                                        | 259.9   | 68.5  | 22.2   | 12.4   | 37.1   | 11.7   | 0.0    | 25.3  | 104.9  | 57.0   | 367.2  | 51.8   | 0.0    | 32.2   | 65.9   | 9.1   | 63.3  | 8.7   |     |
| 179   | Gal1-4GlcNAc1-6(Gal1-3)GalNAc4                                        | 0.0     | 28.7  | 0.0    | 7.2    | 0.0    | 19.2   | 0.0    | 8.4   | 13.3   | 30.3   | 0.0    | 8.4    | 7.2    | 29.9   | 13.5   | 39.8  | 25.5  | 6.8   |     |
| 180   | Gal1-4GlcNAc1-6(Gal1-3)GalNAc4                                        | 2.7     | 34.5  | 25.0   | 6.2    | 11.5   | 4.4    | 29.0   | 8.6   | 63.9   | 10.0   | 146.0  | 35.3   | 0.0    | 20.8   | 63.8   | 20.4  | 148.7 | 51.3  |     |
| 181   | Gal1-4GlcNAc1-6(Gal1-3)GalNAc4                                        | 70.1    | 34.8  | 0.0    | 19.4   | 63.4   | 13.3   | 64.8   | 52.5  | 33.0   | 33.4   | 34.1   | 20.4   | 127.9  | 57.0   | 25.5   | 36.9  | 39.2  | 27.8  |     |
| 182   | Gal1-4GlcNAc1-6(Gal1-3)GalNAc4                                        | 70.1    | 34.8  | 0.0    | 19.4   | 63.4   | 13.3   | 64.8   | 52.5  | 33.0   | 33.4   | 34.1   | 20.4   | 127.9  | 57.0   | 25.5   | 36.9  | 39.2  | 27.8  |     |
| 183   | Gal1-4GlcNAc1-6(Gal1-3)GalNAc4                                        | 10259.3 | 720.8 | 8174.7 | 1011.6 | 8564.8 | 1890.9 | 5942.7 | 463.3 | 5399.9 | 367.2  | 3022.8 | 850.3  | 5488.4 | 2287.9 | 2106.2 | 210.5 | 25.5  | 27.6  |     |
| 184   | Gal1-4GlcNAc1-6(Gal1-3)GalNAc4                                        | 4821.0  | 997.6 | 2272.9 | 75.2   | 2520.7 | 309.0  | 1827.3 | 115.2 | 2698.9 | 217.0  | 1206.3 | 200.0  | 6895.9 | 2068.7 | 62.9   | 26.8  | 73.8  | 67.1  |     |
| 185   | Gal1-4GlcNAc1-6(Gal1-3)GalNAc4                                        | 2470.8  | 42.9  | 3457.8 | 21.8   | 2477.6 | 321.9  | 2568.6 | 121.9 | 4059.3 | 401.8  | 1444.6 | 138.8  | 5477.9 | 528.6  | 146.8  | 21.8  | 97.8  | 135.6 |     |
| 186   | Gal1-4GlcNAc1-6(Gal1-3)GalNAc4                                        | 5834.9  | 221.5 | 3095.1 | 262.8  | 3083.3 | 208.7  | 3010.8 | 110.9 | 2585.2 | 176.6  | 274.4  | 74.5   | 2308.5 | 204.6  | 812.0  | 30.7  | 39.5  | 46.0  |     |
| 187   | Gal1-4GlcNAc1-6(Gal1-3)GalNAc4                                        | 5904.1  | 216.7 | 3650.3 | 111.4  | 2823.8 | 91.6   | 2726.6 | 123.3 | 3811.1 | 822.3  | 1889.3 | 54.4   | 5030.3 | 64.8   | 1468.5 | 107.0 | 5.5   | 23.0  |     |
| 188   | Gal1-4GlcNAc1-6(Gal1-3)GalNAc4                                        | 2294.1  | 107.0 | 1623.7 | 183.3  | 2105.8 | 87.3   | 1301.5 | 75.8  | 1535.6 | 83.9   | 911.7  | 96.3   | 2199.5 | 281.5  | 486.1  | 49.1  | 26.2  | 15.7  |     |
| 189   | Gal1-4GlcNAc1-6(Gal1-3)GalNAc4                                        | 1828.1  | 44.9  | 624.9  | 64.8   | 624.9  | 64.8   | 624.9  | 64.8  | 624.9  | 64.8   | 624.9  | 64.8   | 624.9  | 64.8   | 624.9  | 64.8  | 624.9 | 64.8  |     |
| 190   | Gal1-4GlcNAc1-6(Gal1-3)GalNAc4                                        | 5834.9  | 221.5 | 3095.1 | 262.8  | 3083.3 | 208.7  | 3010.8 | 110.9 | 2585.2 | 176.6  | 274.4  | 74.5   | 2308.5 | 204.6  | 812.0  | 30.7  | 39.5  | 46.0  |     |
| 191   | Gal1-4GlcNAc1-6(Gal1-3)GalNAc4                                        | 5904.1  | 216.7 | 3650.3 | 111.4  | 2823.8 | 91.6   | 2726.6 | 123.3 | 3811.1 | 822.3  | 1889.3 | 54.4   | 5030.3 | 64.8   | 1468.5 | 107.0 | 5.5   | 23.0  |     |
| 192   | Gal1-4GlcNAc1-6(Gal1-3)GalNAc4                                        | 2294.1  | 107.0 | 1623.7 | 183.3  | 2105.8 | 87.3   | 1301.5 | 75.8  | 1535.6 | 83.9   | 911.7  | 96.3   | 2199.5 | 281.5  | 486.1  | 49.1  | 26.2  | 15.7  |     |
| 193   | Gal1-4GlcNAc1-6(Gal1-3)GalNAc4                                        | 1828.1  | 44.9  | 624.9  | 64.8   | 624.9  | 64.8   | 624.9  | 64.8  | 624.9  | 64.8   | 624.9  | 64.8   | 624.9  | 64.8   | 624.9  | 64.8  | 624.9 | 64.8  |     |
| 194   | Gal1-4GlcNAc1-6(Gal1-3)GalNAc4                                        | 2173.1  | 39.8  | 1062.6 | 136.8  | 963.1  | 118.1  | 963.1  | 118.1 | 963.1  | 118.1  | 963.1  | 118.1  | 963.1  | 118.1  | 963.1  | 118.1 | 963.1 | 118.1 |     |
| 195   | Gal1-4GlcNAc1-6(Gal1-3)GalNAc4                                        | 305.6   | 92.1  | 434.5  | 52.3   | 241.0  | 96.3   | 296.5  | 86.4  | 416.7  | 21.1   | 527.9  | 609.3  | 570.6  | 98.7   | 28.5   | 63.2  | 43.8  | 83.7  |     |
| 196</ |                                                                       |         |       |        |        |        |        |        |       |        |        |        |        |        |        |        |       |       |       |     |





Supplemental Table 2. (Continued)

|     |                                                                                                              |        |        |        |       |        |       |        |       |        |       |        |        |        |        |        |       |        |       |
|-----|--------------------------------------------------------------------------------------------------------------|--------|--------|--------|-------|--------|-------|--------|-------|--------|-------|--------|--------|--------|--------|--------|-------|--------|-------|
| 385 | Galb1-4(Fuca1-3)GlcNAc1-6(Fuca1-4)(Fuca1-2Galb1-3)GlcNAc1-3Galb1-4Glc                                        | 148.2  | 77.1   | 0.0    | 24.0  | 0.0    | 7.7   | 5.1    | 32.0  | 83.1   | 32.2  | 102.1  | 68.8   | 0.0    | 34.2   | 6.1    | 19.8  | 62.5   | 43.2  |
| 386 | Galb1-3GlcNAc1-3Galb1-4(Fuca1-3)GlcNAc1-6(Galb1-3)GlcNAc1-3Galb1-4Glc                                        | 156.0  | 52.3   | 73.4   | 23.8  | 65.7   | 14.3  | 21.1   | 18.9  | 80.2   | 53.9  | 46.0   | 30.8   | 49.1   | 34.6   | 37.0   | 50.2  | 39.1   | 45.9  |
| 387 | Galb1-4GlcNAc1-6(Galb1-4)GlcNAc1-2)Man1-6(Galb1-4)GlcNAc1-4(Galb1-4)GlcNAc1-2)Man1-3)Manb1-4)GlcNAc1-4GlcNAc | 5.4    | 51.6   | 0.0    | 25.4  | 0.0    | 10.1  | 0.0    | 194.7 | 69.8   | 23.8  | 101.0  | 20.7   | 8.6    | 64.5   | 24.5   | 4.9   | 123.0  | 33.6  |
| 388 | Galb1-4GlcNAc1-6(Galb1-4)GlcNAc1-2)Man1-3)Manb1-4)GlcNAc1-4GlcNAc                                            | 516.7  | 189.3  | 386.5  | 93.0  | 248.5  | 105.2 | 181.9  | 148.2 | 312.5  | 168.6 | 113.6  | 33.4   | 246.4  | 41.7   | 113.2  | 28.1  | 87.6   | 7.5   |
| 389 | Fuca1-2Galb1-3GalNAc1-3(Fuca1-2)Galb1-4Glc                                                                   | 306.9  | 227.6  | 317.1  | 157.8 | 504.0  | 223.3 | 33.1   | 125.6 | 438.2  | 207.8 | 320.9  | 163.4  | 596.0  | 43.8   | 82.2   | 46.8  | 237.0  | 43.2  |
| 390 | Fuca1-2Galb1-3GalNAc1-3(Fuca1-2)Galb1-4GlcNAc                                                                | 630.9  | 273.1  | 680.0  | 200.8 | 892.5  | 215.7 | 727.9  | 404.3 | 412.1  | 280.3 | 278.2  | 205.4  | 252.4  | 104.9  | 109.8  | 63.1  | 68.0   | 49.8  |
| 391 | Galb1-3GlcNAc1-3GalNAc                                                                                       | 269.3  | 178.4  | 173.4  | 236.3 | 313.2  | 176.9 | 49.0   | 114.6 | 310.6  | 225.8 | 298.6  | 174.5  | 746.2  | 105.6  | 55.6   | 12.0  | 80.5   | 10.7  |
| 392 | GalNAc1-4Neu5Ac2-3Galb1-4GlcNAc1-3GalNAc                                                                     | 1766.5 | 66.7   | 1668.9 | 96.9  | 1084.3 | 60.3  | 1511.5 | 315.9 | 1152.4 | 125.0 | 970.9  | 312.3  | 666.1  | 52.2   | 1087.9 | 107.8 | 1225.4 | 271.1 |
| 393 | GalNAc1-3(Fuca1-2)Galb1-3GalNAc1-4(Fuca1-2)Galb1-4GlcNAc                                                     | 939.4  | 361.5  | 1626.6 | 547.6 | 1898.0 | 188.7 | 1051.8 | 369.7 | 639.4  | 220.1 | 231.6  | 137.9  | 1490.9 | 288.2  | 44.5   | 21.9  | 25.2   | 14.9  |
| 394 | Galb1-3Galb1-4GlcNAc1-2)Man1-6(Galb1-3Galb1-3)GlcNAc1-2)Man1-3)Manb1-4)GlcNAc1-4GlcNAc                       | 877.0  | 287.2  | 684.1  | 251.7 | 710.7  | 244.3 | 941.7  | 81.1  | 902.9  | 356.5 | 2176.5 | 1137.4 | 1143.3 | 182.1  | 345.8  | 155.5 | 379.8  | 189.7 |
| 395 | Galb1-3Galb1-4GlcNAc1-2)Man1-6(Galb1-3Galb1-3)GlcNAc1-2)Man1-3)Manb1-4)GlcNAc1-4GlcNAc                       | 3508.4 | 168.3  | 3981.3 | 361.0 | 3621.6 | 245.0 | 3404.1 | 139.0 | 4332.4 | 618.3 | 4604.1 | 837.1  | 4899.8 | 646.3  | 1238.8 | 73.8  | 499.6  | 72.8  |
| 396 | Neu5Ac2-3Galb1-3GlcNAc1-2)Man1-6(Galb1-3Galb1-3)GlcNAc1-2)Man1-3)Manb1-4)GlcNAc1-4GlcNAc                     | 671.3  | 153.6  | 571.7  | 170.1 | 242.7  | 187.1 | 641.0  | 114.7 | 510.3  | 182.7 | 645.1  | 136.8  | 3015.1 | 804.0  | 209.6  | 68.4  | 385.1  | 99.6  |
| 397 | GlcNAc1-2)Man1-6(Galb1-4)GlcNAc1-2)Man1-3)Manb1-4)GlcNAc1-4GlcNAc                                            | 229.5  | 123.6  | 0.0    | 48.4  | 62.5   | 36.7  | 120.2  | 54.0  | 87.2   | 54.6  | 311.7  | 34.7   | 80.9   | 101.7  | 21.6   | 33.7  | 0.1    | 16.1  |
| 398 | Galb1-4GlcNAc1-2)Man1-6(GlcNAc1-2)Man1-3)Manb1-4)GlcNAc1-4GlcNAc                                             | 523.9  | 80.6   | 293.0  | 41.1  | 266.1  | 71.6  | 338.6  | 50.4  | 477.3  | 74.3  | 422.9  | 39.7   | 1460.2 | 464.4  | 85.2   | 23.7  | 0.1    | 28.8  |
| 399 | Neu5Ac2-3Galb1-3GlcNAc1-3GalNAc                                                                              | 293.9  | 103.8  | 185.9  | 93.0  | 276.1  | 30.8  | 190.7  | 26.6  | 175.3  | 49.2  | 161.7  | 21.7   | 171.1  | 52.4   | 134.0  | 31.7  | 65.8   | 38.8  |
| 400 | Fuca1-2Galb1-4GlcNAc1-3GalNAc                                                                                | 522.8  | 120.5  | 367.9  | 110.3 | 249.0  | 13.9  | 651.5  | 350.2 | 369.7  | 80.2  | 303.4  | 102.7  | 260.1  | 26.3   | 103.5  | 55.6  | 0.1    | 27.7  |
| 401 | Galb1-4(Fuca1-3)GlcNAc1-3GalNAc                                                                              | 366.9  | 83.6   | 332.4  | 128.8 | 498.1  | 111.4 | 323.3  | 78.5  | 428.8  | 120.3 | 413.4  | 115.3  | 283.4  | 176.8  | 160.6  | 9.1   | 91.8   | 23.8  |
| 402 | GalNAc1-3GalNAc1-3Galb1-4Galb1-4GlcNAc                                                                       | 4337.0 | 1435.3 | 2055.9 | 724.4 | 1982.7 | 470.7 | 2705.0 | 952.9 | 1863.9 | 580.9 | 1600.1 | 541.8  | 4633.4 | 268.2  | 917.8  | 424.6 | 24.2   | 14.9  |
| 403 | Galb1-4Galb1-3GlcNAc1-2)Man1-6(Galb1-4Galb1-3)GlcNAc1-2)Man1-3)Manb1-4)GlcNAc1-4GlcNAc                       | 4774.4 | 1605.3 | 2692.0 | 856.9 | 2926.8 | 367.2 | 2875.3 | 785.2 | 2195.3 | 547.3 | 2407.9 | 388.8  | 5448.2 | 588.8  | 971.8  | 584.7 | 81.7   | 33.3  |
| 404 | Galb1-4Galb1-3GlcNAc1-2)Man1-6(Galb1-4Galb1-3)GlcNAc1-2)Man1-3)Manb1-4)GlcNAc1-4GlcNAc                       | 4582.6 | 803.7  | 2004.4 | 235.9 | 1838.7 | 211.0 | 1917.6 | 289.8 | 1629.7 | 241.9 | 1757.0 | 208.2  | 9304.6 | 826.0  | 1344.0 | 161.7 | 65.9   | 11.5  |
| 405 | Galb1-3Galb1-4GlcNAc1-3GalNAc                                                                                | 959.3  | 356.1  | 504.7  | 219.0 | 908.9  | 424.3 | 496.6  | 233.9 | 596.4  | 123.9 | 380.7  | 134.2  | 1875.1 | 173.2  | 102.7  | 43.7  | 37.3   | 8.4   |
| 406 | Galb1-3Galb1-4GlcNAc1-3GalNAc                                                                                | 291.7  | 78.7   | 324.8  | 29.3  | 142.5  | 37.0  | 129.6  | 21.6  | 240.4  | 39.6  | 436.5  | 119.0  | 604.3  | 47.8   | 48.1   | 38.9  | 11.1   | 27.5  |
| 407 | Galb1-3GlcNAc1-2)Man1-6(Galb1-4)GlcNAc1-4GlcNAc                                                              | 7764.9 | 733.5  | 3594.8 | 940.0 | 2696.7 | 473.8 | 3803.6 | 742.7 | 2271.9 | 139.2 | 829.7  | 59.2   | 6710.0 | 706.4  | 885.7  | 73.3  | 22.8   | 19.8  |
| 408 | Galb1-3Galb1-4GlcNAc1-4GlcNAc                                                                                | 2126.3 | 836.9  | 49.6   | 28.4  | 0.0    | 11.1  | 731.8  | 230.8 | 128.8  | 47.6  | 398.9  | 138.5  | 168.8  | 55.9   | 24.7   | 22.2  | 33.8   | 12.2  |
| 409 | Galb1-3Galb1-4GlcNAc1-4GlcNAc                                                                                | 194.4  | 103.9  | 165.7  | 142.7 | 18.1   | 11.7  | 70.3   | 21.8  | 139.4  | 25.7  | 231.6  | 31.6   | 283.8  | 164.3  | 23.9   | 24.5  | 12.2   | 38.8  |
| 410 | Galb1-4GlcNAc1-6(Galb1-4)GlcNAc1-2)Man1-3)Manb1-4)GlcNAc1-4GlcNAc                                            | 190.9  | 43.9   | 192.3  | 150.0 | 68.2   | 103.3 | 34.4   | 97.6  | 118.4  | 18.6  | 58.3   | 20.8   | 178.3  | 33.0   | 31.9   | 45.3  | 45.0   | 33.4  |
| 411 | Galb1-3Galb1-4GlcNAc1-4Neu5Ac2-3Galb1-4GlcNAc                                                                | 2102.1 | 229.9  | 1017.1 | 270.8 | 94.4   | 53.8  | 566.7  | 101.7 | 921.4  | 116.3 | 728.1  | 145.4  | 1390.9 | 93.7   | 102.5  | 45.3  | 175.4  | 31.8  |
| 412 | Neu5Ac2-3Galb1-3GlcNAc1-4Neu5Ac2-8Neu5Ac2-3Galb1-4GlcNAc                                                     | 1078.0 | 350.6  | 523.9  | 292.1 | 867.2  | 180.9 | 378.6  | 149.1 | 652.8  | 69.2  | 329.1  | 106.1  | 736.0  | 270.4  | 278.2  | 61.6  | 52.7   | 20.1  |
| 413 | Galb1-3(Fuca1-2)Galb1-4GlcNAc1-3GalNAc                                                                       | 361.7  | 137.0  | 320.9  | 96.4  | 319.4  | 56.3  | 252.8  | 85.5  | 291.0  | 66.0  | 205.9  | 52.3   | 472.0  | 86.5   | 106.6  | 34.7  | 187.0  | 36.3  |
| 414 | GalNAc1-3(Fuca1-2)Galb1-4GlcNAc1-3GalNAc                                                                     | 525.2  | 53.7   | 673.5  | 26.8  | 691.2  | 88.3  | 594.1  | 120.0 | 563.9  | 48.7  | 508.4  | 34.8   | 265.0  | 171.5  | 148.4  | 34.8  | 0.1    | 8.1   |
| 415 | GalNAc1-3(Fuca1-2)Galb1-4GlcNAc1-3GalNAc                                                                     | 4217.7 | 1547.8 | 3176.7 | 920.3 | 3077.4 | 603.8 | 1956.0 | 828.4 | 3635.6 | 822.8 | 1915.6 | 451.4  | 5110.7 | 1015.3 | 91.7   | 13.8  | 103.7  | 18.9  |
| 416 | Fuca1-2Galb1-4(Fuca1-3)GlcNAc1-3GalNAc                                                                       | 430.7  | 115.0  | 271.4  | 65.8  | 410.2  | 422.2 | 1072.3 | 589.5 | 469.2  | 86.5  | 577.4  | 195.5  | 369.8  | 121.2  | 137.7  | 60.7  | 104.0  | 75.8  |
| 417 | Galb1-3(Fuca1-2)Galb1-4(Fuca1-3)GlcNAc1-3GalNAc                                                              | 1107.5 | 220.7  | 1185.2 | 119.2 | 1023.8 | 82.4  | 824.2  | 220.0 | 1410.7 | 147.1 | 1126.4 | 134.3  | 422.0  | 47.1   | 182.7  | 59.9  | 47.0   | 4.1   |
| 418 | Galb1-3(Fuca1-2)Galb1-4(Fuca1-3)GlcNAc1-3GalNAc                                                              | 353.0  | 208.7  | 133.7  | 51.5  | 329.7  | 84.1  | 330.0  | 49.2  | 283.3  | 64.6  | 420.9  | 93.8   | 515.5  | 21.5   | 73.5   | 83.8  | 123.8  | 53.0  |
| 419 | Galb1-4(Fuca1-3)GlcNAc1-2)Man1-6(Galb1-4)Fuca1-3)GlcNAc1-2)Man1-3)Manb1-4)GlcNAc1-4GlcNAc                    | 372.9  | 66.3   | 384.3  | 100.3 | 314.5  | 110.7 | 266.9  | 54.5  | 188.9  | 52.7  | 456.0  | 147.3  | 463.7  | 176.8  | 46.4   | 118.2 | 22.7   | 22.1  |
| 420 | Fuca1-2Galb1-4GlcNAc1-2)Man1-6(Galb1-4)Fuca1-3)GlcNAc1-2)Man1-3)Manb1-4)GlcNAc1-4GlcNAc                      | 1972.5 | 498.2  | 1718.9 | 129.2 | 1443.0 | 132.9 | 1495.1 | 193.1 | 1606.7 | 130.3 | 1917.4 | 97.9   | 2433.3 | 95.5   | 83.2   | 134.5 | 187.9  | 45.9  |
| 421 | GlcNAc1-2)Man1-6(GlcNAc1-2)Man1-3)Manb1-4)GlcNAc1-4GlcNAc                                                    | 85.6   | 9.3    | 28.0   | 29.8  | 14.2   | 14.1  | 23.2   | 81.7  | 63.9   | 95.8  | 34.0   | 56.7   | 12.5   | 35.7   | 11.7   | 2.0   | 31.4   |       |
| 422 | Fuca1-2Galb1-3GlcNAc1-3GalNAc                                                                                | 234.7  | 106.3  | 190.2  | 39.9  | 198.8  | 54.1  | 0.0    | 361.1 | 180.0  | 45.8  | 471.7  | 89.9   | 100.7  | 95.0   | 51.4   | 28.4  | 60.5   | 19.4  |
| 423 | Galb1-3(Fuca1-2)Galb1-3GlcNAc1-3GalNAc                                                                       | 630.4  | 156.2  | 344.4  | 157.1 | 619.4  | 68.8  | 433.3  | 25.2  | 347.7  | 107.7 | 548.4  | 72.1   | 1244.2 | 170.0  | 114.4  | 23.1  | 25.7   | 30.6  |
| 424 | GalNAc1-3(Fuca1-2)Galb1-3GlcNAc1-3GalNAc                                                                     | 794.3  | 175.0  | 536.9  | 91.8  | 370.6  | 39.9  | 650.3  | 36.7  | 428.2  | 46.1  | 474.1  | 116.9  | 453.5  | 25.2   | 242.2  | 30.9  | 83.1   | 7.6   |
| 425 | Galb1-3Galb1-4GlcNAc1-3GalNAc                                                                                | 1059.9 | 150.4  | 694.8  | 143.9 | 710.1  | 178.9 | 697.2  | 43.1  | 999.6  | 178.4 | 1241.3 | 70.4   | 1360.6 | 126.8  | 481.2  | 122.1 | 43.8   | 4.6   |
| 426 | Galb1-3Galb1-4GlcNAc1-4(Fuca1-6)GlcNAc                                                                       | 1755.5 | 310.3  | 1745.7 | 328.4 | 1222.5 | 146.3 | 1367.9 | 145.8 | 1383.3 | 91.2  | 1477.5 | 79.2   | 2485.5 | 1020.0 | 825.1  | 65.5  | 96.1   | 19.8  |
| 427 | Galb1-3(Fuca1-2)Galb1-4GlcNAc1-2)Man1-6(Galb1-3)Fuca1-2)Galb1-4GlcNAc1-2)Man1-3)Manb1-4)GlcNAc1-4GlcNAc      | 1814.5 | 487.8  | 1546.7 | 387.9 | 1880.7 | 339.6 | 1859.6 | 528.2 | 1992.8 | 175.8 | 913.3  | 158.3  | 1545.7 | 244.5  | 135.8  | 75.7  | 31.8   | 7.3   |
| 428 | Galb1-3GlcNAc1-6(Galb1-3)GlcNAc1-2)Man1-6(Galb1-3)GlcNAc1-2)Man1-3)Manb1-4)GlcNAc1-4GlcNAc                   | 1229.5 | 248.9  | 1758.9 | 361.0 | 1066.7 | 155.9 | 1209.5 | 203.9 | 1125.5 | 184.9 | 784.2  | 126.5  | 1376.1 | 150.5  | 67.1   | 25.7  | 82.6   | 13.3  |
| 429 | Galb1-4GlcNAc1-6(Galb1-4)GlcNAc1-2)Man1-6(Galb1-4)GlcNAc1-2)Man1-3)Manb1-4)GlcNAc1-4GlcNAc                   | 153.4  | 59.1   | 165.6  | 61.7  | 395.2  | 170.4 | 210.6  | 104.1 | 25.2   | 123.5 | 20.6   | 349.8  | 42.1   | 61.2   | 24.4   | 0.7   | 23.2   |       |
| 430 | Fuca1-3GlcNAc1-6(Galb1-4)GlcNAc1-3)Galb1-4Glc                                                                | 598.3  | 213.3  | 539.2  | 169.8 | 288.5  | 125.3 | 385.2  | 174.2 | 407.2  | 65.1  | 428.2  | 167.5  | 709.3  | 65.3   | 250.0  | 73.7  | 190.6  | 63.8  |
| 431 | GlcNAc1-2)Man1-6(GlcNAc1-4)GlcNAc1-2)Man1-3)Manb1-4)GlcNAc1-4GlcNAc                                          | 133.1  | 84.5   | 408.1  | 54.1  | 1235.6 | 138.7 | 309.8  | 100.2 | 854.9  | 145.7 | 247.0  | 32.8   | 142.2  | 33.3   | 141.1  | 93.3  | 22.2   | 15.4  |
| 432 | GlcNAc1-2)Man1-6(GlcNAc1-4)GlcNAc1-4)GlcNAc1-2)Man1-3)Manb1-4)GlcNAc1-4GlcNAc                                | 169.2  | 34.4   | 52.2   | 28.2  | 20.4   | 15.5  | 53.4   | 14.3  | 21.4   | 11.8  | 62.2   | 38.4   | 52.3   | 12.1   | 20.3   | 14.9  | 5.6    | 16.7  |
| 433 | GlcNAc1-4)GlcNAc1-2)Man1-6(GlcNAc1-4)GlcNAc1-2)Man1-3)Manb1-4)GlcNAc1-4GlcNAc                                | 666.8  | 108.0  | 230.0  |       |        |       |        |       |        |       |        |        |        |        |        |       |        |       |

Supplemental Table 2. (Continued)

|     |                                                                                                                  |        |        |        |        |        |       |        |       |        |        |        |       |        |       |        |       |       |      |
|-----|------------------------------------------------------------------------------------------------------------------|--------|--------|--------|--------|--------|-------|--------|-------|--------|--------|--------|-------|--------|-------|--------|-------|-------|------|
| 474 | Neu5Ac2-3Gal1-3GlcNAc1-6(Neu5Ac2-3Gal1-3GlcNAc1-2)Man1-6(Neu5Ac2-3Gal1-3GlcNAc1-2)Man1-3)Man1-4(GlcNAc1-4)GlcNAc | 849.5  | 105.7  | 685.2  | 39.0   | 593.7  | 43.7  | 744.0  | 360.4 | 1036.8 | 65.5   | 2856.4 | 468.5 | 762.0  | 76.7  | 437.4  | 92.1  | 102.2 | 24.9 |
| 475 | GlcNAc1-6(GlcNAc1-2)Man1-6(GlcNAc1-2)Man1-3)Man1-4(GlcNAc1-4)Fucal-6(GlcNAc1-4)GlcNAc                            | 462.3  | 80.5   | 211.5  | 54.7   | 342.5  | 94.8  | 197.5  | 52.8  | 380.6  | 90.4   | 512.2  | 67.7  | 105.0  | 58.7  | 125.1  | 45.4  | 84.3  | 28.6 |
| 476 | Gal1-3(GlcNAc1-2)Man1-6(GlcNAc1-4)Gal1-3(GlcNAc1-2)Man1-3)Man1-4(GlcNAc1-4)GlcNAc                                | 4573.0 | 823.6  | 5245.3 | 1681.0 | 3990.0 | 338.0 | 5453.1 | 904.6 | 3084.2 | 284.5  | 3488.9 | 493.8 | 1518.8 | 118.9 | 2482.4 | 291.6 | 196.8 | 61.1 |
| 477 | Neu5Ac2-6Gal1-4(GlcNAc1-6)Gal1-3(GlcNAc1-3)Gal1-4(GlcNAc1-6)Gal1-3(GlcNAc1-2)Man1-6(GlcNAc1-4)GlcNAc             | 414.2  | 100.5  | 311.7  | 67.2   | 300.4  | 47.8  | 229.7  | 22.0  | 349.0  | 72.3   | 304.7  | 50.5  | 146.9  | 18.7  | 96.5   | 54.7  | 102.3 | 71.3 |
| 478 | Neu5Ac2-3Gal1-4(GlcNAc1-6)Gal1-3(GlcNAc1-2)Man1-6(GlcNAc1-4)GlcNAc                                               | 1093.6 | 46.4   | 933.4  | 107.6  | 688.6  | 83.8  | 946.5  | 220.2 | 726.3  | 162.0  | 3165.9 | 363.8 | 563.4  | 130.4 | 545.7  | 128.2 | 116.9 | 23.3 |
| 479 | Neu5Ac2-3Gal1-4(GlcNAc1-6)Gal1-3(GlcNAc1-2)Man1-6(GlcNAc1-4)GlcNAc                                               | 342.3  | 328.8  | 1756.2 | 488.8  | 2032.4 | 92.8  | 328.3  | 122.1 | 2263.7 | 374.1  | 1455.4 | 127.5 | 205.8  | 51.7  | 1023.5 | 138.5 | 81.5  | 43.8 |
| 480 | Neu5Ac2-6Gal1-4(GlcNAc1-6)Gal1-3(GlcNAc1-2)Man1-6(GlcNAc1-4)GlcNAc                                               | 426.0  | 189.6  | 471.9  | 131.3  | 743.9  | 306.9 | 454.9  | 27.4  | 1007.7 | 590.8  | 666.5  | 367.7 | 906.2  | 44.0  | 101.0  | 55.4  | 78.2  | 21.4 |
| 481 | Neu5Ac2-6Gal1-4(GlcNAc1-6)Gal1-3(GlcNAc1-2)Man1-6(GlcNAc1-4)GlcNAc                                               | 238.8  | 38.8   | 317.2  | 59.7   | 232.9  | 65.3  | 240.9  | 64.9  | 359.0  | 143.1  | 362.7  | 153.1 | 554.7  | 23.3  | 27.4   | 33.5  | 0.1   | 34.5 |
| 482 | Neu5Ac2-6Gal1-4(GlcNAc1-6)Gal1-3(GlcNAc1-2)Man1-6(GlcNAc1-4)GlcNAc                                               | 100.1  | 91.2   | 66.9   | 67.7   | 109.5  | 155.1 | 36.6   | 69.2  | 45.8   | 99.0   | 68.7   | 140.6 | 185.5  | 72.5  | 259.3  | 446.7 | 34.4  | 9.8  |
| 483 | Neu5Ac2-3Gal1-4(GlcNAc1-6)Gal1-3(GlcNAc1-2)Man1-6(GlcNAc1-4)GlcNAc                                               | 86.5   | 57.2   | 58.8   | 17.3   | 51.1   | 41.3  | 63.6   | 10.0  | 112.0  | 45.3   | 113.7  | 48.8  | 0.0    | 30.9  | 72.3   | 49.9  | 70.8  | 22.9 |
| 484 | Man1-6(Man1-4)GlcNAc1-6(GlcNAc1-4)Fucal-6(GlcNAc1-4)GlcNAc                                                       | 948.7  | 54.6   | 920.2  | 156.2  | 45.9   | 16.9  | 1187.4 | 249.6 | 121.2  | 49.4   | 307.2  | 103.1 | 101.5  | 42.3  | 127.5  | 11.1  | 74.1  | 15.5 |
| 485 | Gal1-3(GlcNAc1-2)Man1-6(GlcNAc1-4)Gal1-3(GlcNAc1-2)Man1-6(GlcNAc1-4)GlcNAc                                       | 1286.1 | 96.0   | 727.1  | 145.1  | 212.5  | 106.3 | 723.9  | 46.8  | 710.9  | 102.4  | 288.4  | 86.9  | 413.4  | 58.7  | 102.2  | 77.0  | 0.1   | 34.5 |
| 486 | Neu5Ac2-3Gal1-4(GlcNAc1-6)Gal1-3(GlcNAc1-2)Man1-6(GlcNAc1-4)GlcNAc                                               | 316.4  | 52.5   | 286.2  | 81.4   | 40.8   | 33.6  | 378.9  | 45.7  | 62.9   | 24.8   | 326.7  | 44.7  | 310.6  | 73.9  | 106.7  | 37.0  | 25.8  | 11.4 |
| 487 | Neu5Ac2-6Gal1-4(GlcNAc1-6)Gal1-3(GlcNAc1-2)Man1-6(GlcNAc1-4)GlcNAc                                               | 503.3  | 111.8  | 436.3  | 43.2   | 329.9  | 31.5  | 273.0  | 58.5  | 365.6  | 120.8  | 196.5  | 104.1 | 279.4  | 30.4  | 73.3   | 63.0  | 0.1   | 51.3 |
| 488 | Gal1-3(GlcNAc1-2)Man1-6(GlcNAc1-4)Gal1-3(GlcNAc1-2)Man1-6(GlcNAc1-4)GlcNAc                                       | 752.4  | 224.9  | 331.9  | 148.1  | 161.2  | 37.6  | 188.0  | 121.9 | 44.1   | 7.7    | 416.7  | 98.7  | 1284.6 | 107.8 | 83.4   | 16.0  | 7.0   | 37.4 |
| 489 | Gal1-3(GlcNAc1-2)Man1-6(GlcNAc1-4)Gal1-3(GlcNAc1-2)Man1-6(GlcNAc1-4)GlcNAc                                       | 1692.9 | 543.4  | 610.9  | 284.1  | 793.4  | 165.4 | 483.6  | 156.7 | 914.2  | 229.2  | 493.1  | 111.0 | 1947.3 | 126.0 | 92.2   | 29.4  | 27.0  | 17.1 |
| 490 | Gal1-3(GlcNAc1-2)Man1-6(GlcNAc1-4)Gal1-3(GlcNAc1-2)Man1-6(GlcNAc1-4)GlcNAc                                       | 100.0  | 72.7   | 34.8   | 55.7   | 124.5  | 39.3  | 244.1  | 12.4  | 0.0    | 16.3   | 47.1   | 101.5 | 154.3  | 28.8  | 31.9   | 4.6   | 0.1   | 27.9 |
| 491 | Neu5Ac2-3Gal1-4(GlcNAc1-6)Gal1-3(GlcNAc1-2)Man1-6(GlcNAc1-4)GlcNAc                                               | 1630.9 | 468.3  | 787.7  | 269.1  | 387.7  | 134.8 | 498.3  | 174.0 | 535.3  | 124.5  | 605.2  | 188.9 | 2454.0 | 192.8 | 434.8  | 173.3 | 0.1   | 33.8 |
| 492 | 3S(Gal1-3)Fucal-4(GlcNAc1-6)Gal1-3(GlcNAc1-2)Man1-6(GlcNAc1-4)GlcNAc                                             | 30.8   | 74.7   | 257.4  | 58.2   | 190.1  | 13.4  | 484.0  | 224.0 | 277.9  | 67.8   | 56.8   | 88.2  | 50.9   | 152.5 | 118.6  | 31.9  | 42.7  | 14.7 |
| 493 | Gal1-3(GlcNAc1-2)Man1-6(GlcNAc1-4)Gal1-3(GlcNAc1-2)Man1-6(GlcNAc1-4)GlcNAc                                       | 449.8  | 109.2  | 267.1  | 39.1   | 198.8  | 33.3  | 146.4  | 43.0  | 250.0  | 60.5   | 126.8  | 25.9  | 408.6  | 42.2  | 192.5  | 12.9  | 53.9  | 10.6 |
| 494 | Fucal-2(Gal1-3)GlcNAc1-6(GlcNAc1-4)GlcNAc                                                                        | 571.1  | 36.0   | 629.0  | 17.0   | 563.4  | 56.8  | 1181.9 | 185.0 | 869.3  | 21.7   | 1008.4 | 49.7  | 1236.0 | 171.8 | 212.5  | 8.4   | 0.1   | 20.7 |
| 495 | Gal1-3(GlcNAc1-2)Man1-6(GlcNAc1-4)Gal1-3(GlcNAc1-2)Man1-6(GlcNAc1-4)GlcNAc                                       | 1664.8 | 340.0  | 394.8  | 189.3  | 595.0  | 260.2 | 368.2  | 106.8 | 389.7  | 182.3  | 389.6  | 67.2  | 2026.7 | 534.1 | 165.4  | 68.9  | 0.1   | 49.6 |
| 496 | Gal1-3(GlcNAc1-2)Man1-6(GlcNAc1-4)Gal1-3(GlcNAc1-2)Man1-6(GlcNAc1-4)GlcNAc                                       | 225.2  | 73.9   | 3.4    | 8.4    | 0.0    | 60.4  | 296.5  | 6.4   | 166.9  | 19.2   | 584.9  | 33.8  | 73.4   | 30.1  | 34.8   | 21.4  | 24.6  | 49.8 |
| 497 | Fucal-2(Gal1-3)GlcNAc1-6(GlcNAc1-4)GlcNAc                                                                        | 2091.2 | 236.0  | 1640.1 | 109.2  | 1437.4 | 135.8 | 1241.1 | 187.7 | 1892.5 | 144.4  | 2118.4 | 140.7 | 656.5  | 65.4  | 815.4  | 146.7 | 11.8  | 29.0 |
| 498 | Gal1-3(GlcNAc1-2)Man1-6(GlcNAc1-4)Gal1-3(GlcNAc1-2)Man1-6(GlcNAc1-4)GlcNAc                                       | 1207.6 | 256.3  | 552.7  | 214.5  | 713.3  | 111.8 | 900.1  | 116.9 | 1029.3 | 187.1  | 899.7  | 202.5 | 648.6  | 77.4  | 424.9  | 141.8 | 104.3 | 31.7 |
| 499 | Gal1-3(GlcNAc1-2)Man1-6(GlcNAc1-4)Gal1-3(GlcNAc1-2)Man1-6(GlcNAc1-4)GlcNAc                                       | 1934.5 | 160.1  | 1374.9 | 253.8  | 1503.2 | 131.5 | 983.3  | 186.2 | 1641.5 | 52.7   | 1455.3 | 114.5 | 803.0  | 30.5  | 464.0  | 68.9  | 74.3  | 18.6 |
| 500 | Fucal-2(Gal1-3)GlcNAc1-6(GlcNAc1-4)GlcNAc                                                                        | 6197.0 | 1565.8 | 5649.7 | 129.2  | 4076.2 | 366.0 | 4738.5 | 468.9 | 4624.3 | 696.5  | 9232.3 | 473.4 | 3606.9 | 895.2 | 1968.1 | 189.1 | 150.1 | 16.6 |
| 501 | Neu5Ac2-6Gal1-4(GlcNAc1-6)Gal1-3(GlcNAc1-2)Man1-6(GlcNAc1-4)GlcNAc                                               | 767.4  | 195.3  | 534.0  | 189.3  | 495.6  | 106.3 | 567.1  | 105.9 | 713.7  | 81.7   | 493.5  | 136.8 | 486.9  | 33.6  | 37.2   | 11.5  | 23.5  | 9.0  |
| 502 | Gal1-3(GlcNAc1-2)Man1-6(GlcNAc1-4)Gal1-3(GlcNAc1-2)Man1-6(GlcNAc1-4)GlcNAc                                       | 690.2  | 105.2  | 651.8  | 213.8  | 458.2  | 63.7  | 214.4  | 124.4 | 1170.0 | 178.3  | 187.3  | 83.5  | 338.7  | 119.4 | 14.9   | 22.9  | 30.2  |      |
| 503 | Gal1-3(GlcNAc1-2)Man1-6(GlcNAc1-4)Gal1-3(GlcNAc1-2)Man1-6(GlcNAc1-4)GlcNAc                                       | 344.5  | 139.4  | 367.0  | 191.4  | 615.9  | 93.0  | 428.2  | 144.7 | 447.9  | 169.3  | 463.3  | 13.2  | 2308.2 | 136.5 | 60.5   | 39.9  | 89.3  | 7.9  |
| 504 | Gal1-3(GlcNAc1-2)Man1-6(GlcNAc1-4)Gal1-3(GlcNAc1-2)Man1-6(GlcNAc1-4)GlcNAc                                       | 733.6  | 18.8   | 1030.4 | 63.3   | 679.0  | 68.6  | 802.1  | 72.0  | 1567.4 | 84.8   | 1348.5 | 50.9  | 869.5  | 100.5 | 230.4  | 12.3  | 100.9 | 33.5 |
| 505 | Fucal-2(Gal1-3)GlcNAc1-6(GlcNAc1-4)GlcNAc                                                                        | 334.5  | 452.4  | 95.4   | 48.0   | 0.0    | 15.7  | 840.4  | 138.0 | 179.6  | 36.1   | 114.6  | 28.1  | 61.6   | 9.3   | 41.0   | 11.2  | 12.2  | 37.7 |
| 506 | Gal1-3(GlcNAc1-2)Man1-6(GlcNAc1-4)Gal1-3(GlcNAc1-2)Man1-6(GlcNAc1-4)GlcNAc                                       | 1316.5 | 28.6   | 10.6   | 7.9    | 0.0    | 6.3   | 325.3  | 459.1 | 8.3    | 12.8   | 156.8  | 38.3  | 0.0    | 24.3  | 83.3   | 15.1  | 76.6  | 29.0 |
| 507 | Gal1-3(GlcNAc1-2)Man1-6(GlcNAc1-4)Gal1-3(GlcNAc1-2)Man1-6(GlcNAc1-4)GlcNAc                                       | 75.6   | 28.0   | 10.6   | 7.9    | 0.0    | 6.3   | 325.3  | 459.1 | 8.3    | 12.8   | 156.8  | 38.3  | 0.0    | 24.3  | 83.3   | 15.1  | 76.6  | 29.0 |
| 508 | Gal1-3(GlcNAc1-2)Man1-6(GlcNAc1-4)Gal1-3(GlcNAc1-2)Man1-6(GlcNAc1-4)GlcNAc                                       | 215.3  | 79.8   | 98.2   | 43.1   | 22.4   | 12.9  | 70.2   | 11.6  | 148.0  | 17.9   | 40.8   | 15.5  | 13.7   | 39.9  | 26.1   | 36.5  | 0.1   | 26.3 |
| 509 | Gal1-3(GlcNAc1-2)Man1-6(GlcNAc1-4)Gal1-3(GlcNAc1-2)Man1-6(GlcNAc1-4)GlcNAc                                       | 6718.5 | 1177.4 | 2515.4 | 600.0  | 3407.5 | 94.5  | 3655.4 | 542.3 | 909.4  | 361.7  | 431.8  | 102.3 | 3351.0 | 707.0 | 97.8   | 13.7  | 1.4   | 20.9 |
| 510 | Gal1-3(GlcNAc1-2)Man1-6(GlcNAc1-4)Gal1-3(GlcNAc1-2)Man1-6(GlcNAc1-4)GlcNAc                                       | 472.1  | 99.8   | 150.5  | 72.0   | 248.0  | 139.9 | 201.1  | 82.4  | 230.2  | 31.6   | 94.0   | 33.1  | 412.7  | 47.3  | 51.5   | 17.8  | 0.1   | 39.6 |
| 511 | (6S)4S(GlcNAc1-4)GlcNAc                                                                                          | 63.7   | 7.2    | 103.1  | 50.9   | 89.1   | 17.1  | 140.3  | 45.7  | 14.7   | 30.7   | 323.1  | 59.5  | 74.5   | 29.3  | 65.8   | 9.8   | 0.1   | 6.1  |
| 512 | (5S)4S(GlcNAc1-4)GlcNAc                                                                                          | 158.2  | 44.0   | 189.0  | 62.5   | 153.5  | 42.0  | 139.4  | 22.5  | 19.4   | 38.1   | 255.9  | 64.4  | 47.5   | 42.5  | 64.6   | 23.5  | 0.0   | 19.5 |
| 513 | (3S)4S(GlcNAc1-4)GlcNAc                                                                                          | 44.5   | 260.0  | 441.1  | 102.2  | 554.8  | 36.3  | 286.1  | 69.9  | 80.8   | 85.8   | 707.5  | 129.9 | 1003.9 | 296.5 | 0.0    | 56.1  | 8.9   | 12.3 |
| 514 | Gal1-3(GlcNAc1-2)Man1-6(GlcNAc1-4)Gal1-3(GlcNAc1-2)Man1-6(GlcNAc1-4)GlcNAc                                       | 917.9  | 175.2  | 689.5  | 189.3  | 383.3  | 136.4 | 507.7  | 189.5 | 467.2  | 177.4  | 1443.5 | 343.7 | 1454.7 | 232.6 | 72.8   | 0.1   | 21.9  |      |
| 515 | (3S)4S(GlcNAc1-4)GlcNAc                                                                                          | 846.9  | 246.8  | 276.0  | 265.4  | 781.4  | 383.2 | 282.4  | 138.5 | 408.2  | 67.9   | 263.9  | 159.1 | 1299.3 | 424.6 | 120.2  | 15.4  | 5.7   | 24.4 |
| 516 | (4S)4S(GlcNAc1-4)GlcNAc                                                                                          | 537.6  | 116.2  | 244.6  | 211.8  | 294.7  | 47.1  | 214.4  | 124.4 | 122.4  | 1170.0 | 178.3  | 187.3 | 83.5   | 338.7 | 119.4  | 14.9  | 22.9  | 30.2 |
| 517 | Gal1-3(GlcNAc1-2)Man1-6(GlcNAc1-4)Gal1-3(GlcNAc1-2)Man1-6(GlcNAc1-4)GlcNAc                                       | 120.4  | 67.0   | 129.8  | 88.2   | 255.5  | 210.9 | 309.6  | 185.6 | 152.3  | 93.3   | 352.7  | 81.1  | 495.0  | 86.4  | 29.5   | 24.4  | 0.1   | 19.4 |
| 518 | (6P)Gal1-3(GlcNAc1-2)Man1-6(GlcNAc1-4)Gal1-3(GlcNAc1-2)Man1-6(GlcNAc1-4)GlcNAc                                   | 3895.4 | 163.1  | 802.5  | 284.2  | 1474.9 | 125.4 | 1225.8 | 170.8 | 1477.9 | 248.5  | 877.0  | 66.3  | 6144.1 | 293.9 | 1098.8 | 123.8 | 241.5 | 19.7 |
| 519 | Gal1-3(GlcNAc1-2)Man1-6(GlcNAc1-4)Gal1-3(GlcNAc1-2)Man1-6(GlcNAc1-4)GlcNAc                                       | 2254.5 | 309.8  | 1176.3 | 284.2  | 628.4  | 132.4 | 1249.3 | 227.5 | 768.4  | 108.9  | 1284.4 | 33.8  | 62.4   | 48.4  | 23.9   | 15.9  | 42.8  | 14.7 |
| 520 | Neu5Ac2-6Gal1-4(GlcNAc1-6)Gal1-3(GlcNAc1-2)Man1-6(GlcNAc1-4)GlcNAc                                               | 554.9  | 51.1   | 463.3  | 57.3   | 346.3  | 93.8  | 402.8  | 85.1  | 286.6  | 102.3  | 378.2  | 51.1  | 218.7  | 22.8  | 233.2  | 46.2  | 157.2 | 73.1 |
| 521 | Gal1-3(GlcNAc1-2)Man1-6(GlcNAc1-4)Gal1-3(GlcNAc1-2)Man1-6(GlcNAc1-4)GlcNAc                                       | 871.8  | 92.8   | 450.4  | 122.6  | 613.3  | 152.8 |        |       |        |        |        |       |        |       |        |       |       |      |
